# Supplementary material for: TAP: a targeted clinical genomics pipeline for detecting transcript variants using RNA-seq data
Source: PubMed Central journal article supplement (PMC6131862; doi:10.1186/s12920-018-0402-6), 2018-09-10
Supplement: 12920_2018_402_MOESM2_ESM.pdf [file 12920_2018_402_MOESM2_ESM.pdf]

**Table S4. AML-relevant structural variants detected by TAP in Leucegene samples**

| sample | event  | coord1         | coord2         | 5'gene | 3'gene  | 5'exon | 3'exon | in_frame | size | spanning_reads |
|--------|--------|----------------|----------------|--------|---------|--------|--------|----------|------|----------------|
| 03H065 | fusion | chr8:93029591  | chr21:36231770 | RUNX1  | RUNX1T1 | 6      | 6      | T        | na   | 108            |
| 03H065 | fusion | chr8:93074855  | chr21:36231770 | RUNX1  | RUNX1T1 | 6      | 5      | F        | na   | 7              |
| 03H065 | fusion | chr8:93074937  | chr21:36231770 | RUNX1  | RUNX1T1 | 6      | 2      | F        | na   | 13             |
| 03H083 | fusion | chr8:93029591  | chr21:36231770 | RUNX1  | RUNX1T1 | 6      | 6      | T        | na   | 108            |
| 03H095 | fusion | chr16:15818197 | chr16:67116210 | CBFB   | MYH11   | 5      | 32     | T        | na   | 93             |
| 03H095 | fusion | chr16:15818198 | chr16:67116209 | CBFB   | MYH11   | 5      | 32     | T        | na   | 32             |
| 03H109 | fusion | chr16:15814908 | chr16:67116241 | CBFB   | MYH11   | 5      | 34     | F        | na   | 7              |
| 03H112 | fusion | chr16:15814908 | chr16:67116210 | CBFB   | MYH11   | 5      | 34     | T        | na   | 75             |
| 03H112 | ITD    | chr13:28608084 | chr13:28608263 | FLT3   | FLT3    | 15     | 14     | T        | 93   | 115            |
| 04H030 | fusion | chr16:15814908 | chr16:67116210 | CBFB   | MYH11   | 5      | 34     | T        | na   | 80             |
| 04H030 | ITD    | chr13:28608253 | chr13:28608309 | FLT3   | FLT3    | 14     | 14     | T        | 57   | 17             |
| 04H061 | fusion | chr16:15814908 | chr16:67116210 | CBFB   | MYH11   | 5      | 34     | T        | na   | 41             |
| 04H091 | fusion | chr16:15820911 | chr16:67116210 | CBFB   | MYH11   | 5      | 29     | T        | na   | 82             |
| 05H042 | fusion | chr8:93029591  | chr21:36231770 | RUNX1  | RUNX1T1 | 6      | 6      | T        | na   | 182            |
| 05H042 | fusion | chr8:93074937  | chr21:36231770 | RUNX1  | RUNX1T1 | 6      | 2      | F        | na   | 123            |
| 05H099 | fusion | chr16:15814908 | chr16:67116210 | CBFB   | MYH11   | 5      | 34     | T        | na   | 48             |
| 05H113 | fusion | chr16:15814908 | chr16:67116210 | CBFB   | MYH11   | 5      | 34     | T        | na   | 88             |
| 05H118 | fusion | chr8:93029591  | chr21:36231770 | RUNX1  | RUNX1T1 | 6      | 6      | T        | na   | 117            |
| 05H118 | fusion | chr8:93074855  | chr21:36231770 | RUNX1  | RUNX1T1 | 6      | 5      | F        | na   | 15             |
| 05H118 | fusion | chr8:93074937  | chr21:36231770 | RUNX1  | RUNX1T1 | 6      | 2      | F        | na   | 52             |
| 05H136 | fusion | chr16:15814908 | chr16:67116210 | CBFB   | MYH11   | 5      | 34     | T        | na   | 86             |
| 05H136 | fusion | chr16:15814908 | chr16:67116241 | CBFB   | MYH11   | 5      | 34     | F        | na   | 4              |
| 05H184 | fusion | chr8:93023319  | chr21:36231770 | RUNX1  | RUNX1T1 | 6      | 8      | F        | na   | 13             |
| 05H184 | fusion | chr8:93029591  | chr21:36231770 | RUNX1  | RUNX1T1 | 6      | 6      | T        | na   | 277            |
| 05H184 | fusion | chr8:93074855  | chr21:36231770 | RUNX1  | RUNX1T1 | 6      | 5      | F        | na   | 19             |
| 05H184 | fusion | chr8:93074937  | chr21:36231770 | RUNX1  | RUNX1T1 | 6      | 2      | F        | na   | 103            |
| 06H020 | fusion | chr16:15814908 | chr16:67116210 | CBFB   | MYH11   | 5      | 34     | T        | na   | 117            |
| 06H020 | fusion | chr16:15814908 | chr16:67116241 | CBFB   | MYH11   | 5      | 34     | F        | na   | 6              |
| 06H035 | fusion | chr8:93029591  | chr21:36231770 | RUNX1  | RUNX1T1 | 6      | 6      | T        | na   | 166            |
| 06H035 | fusion | chr8:93074937  | chr21:36231770 | RUNX1  | RUNX1T1 | 6      | 2      | F        | na   | 19             |
| 06H115 | fusion | chr16:15814908 | chr16:67116210 | CBFB   | MYH11   | 5      | 34     | T        | na   | 109            |

|        |        |                |                |       |         |    |    |   |    |     |
|--------|--------|----------------|----------------|-------|---------|----|----|---|----|-----|
| 06H115 | fusion | chr16:15814908 | chr16:67116241 | CBFB  | MYH11   | 5  | 34 | F | na | 11  |
| 07H099 | fusion | chr16:15814908 | chr16:67116210 | CBFB  | MYH11   | 5  | 34 | T | na | 44  |
| 07H137 | fusion | chr8:93029591  | chr21:36231770 | RUNX1 | RUNX1T1 | 6  | 6  | T | na | 255 |
| 07H144 | fusion | chr16:15814908 | chr16:67116210 | CBFB  | MYH11   | 5  | 34 | T | na | 158 |
| 07H144 | fusion | chr16:15814908 | chr16:67116241 | CBFB  | MYH11   | 5  | 34 | F | na | 10  |
| 08H034 | fusion | chr8:93029591  | chr21:36231770 | RUNX1 | RUNX1T1 | 6  | 6  | T | na | 99  |
| 08H034 | fusion | chr8:93074855  | chr21:36231770 | RUNX1 | RUNX1T1 | 6  | 5  | F | na | 4   |
| 08H034 | fusion | chr8:93074937  | chr21:36231770 | RUNX1 | RUNX1T1 | 6  | 2  | F | na | 47  |
| 08H042 | fusion | chr8:93029591  | chr21:36231770 | RUNX1 | RUNX1T1 | 6  | 6  | T | na | 140 |
| 08H042 | fusion | chr8:93074937  | chr21:36231770 | RUNX1 | RUNX1T1 | 6  | 2  | F | na | 36  |
| 08H072 | fusion | chr8:93029591  | chr21:36231770 | RUNX1 | RUNX1T1 | 6  | 6  | T | na | 252 |
| 08H072 | fusion | chr8:93074855  | chr21:36231770 | RUNX1 | RUNX1T1 | 6  | 5  | F | na | 23  |
| 08H072 | fusion | chr8:93074937  | chr21:36231770 | RUNX1 | RUNX1T1 | 6  | 2  | F | na | 103 |
| 08H072 | ins    | chr13:28608248 | chr13:28608248 | FLT3  | FLT3    | 14 | 14 | T | 21 | 98  |
| 08H081 | fusion | chr16:15814908 | chr16:67116210 | CBFB  | MYH11   | 5  | 34 | T | na | 135 |
| 08H081 | fusion | chr16:15814908 | chr16:67116241 | CBFB  | MYH11   | 5  | 34 | F | na | 30  |
| 08H099 | fusion | chr16:15814908 | chr16:67116210 | CBFB  | MYH11   | 5  | 34 | T | na | 65  |
| 08H099 | fusion | chr16:15814908 | chr16:67116241 | CBFB  | MYH11   | 5  | 34 | F | na | 8   |
| 09H016 | fusion | chr16:15814908 | chr16:67116210 | CBFB  | MYH11   | 5  | 34 | T | na | 79  |
| 09H040 | fusion | chr8:93029591  | chr21:36231770 | RUNX1 | RUNX1T1 | 6  | 6  | T | na | 299 |
| 09H040 | fusion | chr8:93074937  | chr21:36231770 | RUNX1 | RUNX1T1 | 6  | 2  | F | na | 79  |
| 09H066 | fusion | chr16:15814908 | chr16:67116210 | CBFB  | MYH11   | 5  | 34 | T | na | 31  |
| 10H008 | fusion | chr16:15818849 | chr16:67116210 | CBFB  | MYH11   | 5  | 30 | T | na | 129 |
| 10H008 | fusion | chr16:15818849 | chr16:67116241 | CBFB  | MYH11   | 5  | 30 | F | na | 12  |
| 10H030 | fusion | chr8:93029591  | chr21:36231770 | RUNX1 | RUNX1T1 | 6  | 6  | T | na | 127 |
| 10H030 | fusion | chr8:93074855  | chr21:36231770 | RUNX1 | RUNX1T1 | 6  | 5  | F | na | 4   |
| 10H030 | fusion | chr8:93074937  | chr21:36231770 | RUNX1 | RUNX1T1 | 6  | 2  | F | na | 33  |
| 10H119 | fusion | chr8:93029591  | chr21:36231770 | RUNX1 | RUNX1T1 | 6  | 6  | T | na | 219 |
| 11H022 | fusion | chr16:15814908 | chr16:67116210 | CBFB  | MYH11   | 5  | 34 | T | na | 41  |
| 11H022 | fusion | chr16:15814908 | chr16:67116241 | CBFB  | MYH11   | 5  | 34 | F | na | 8   |
| 11H022 | ins    | chr13:28608269 | chr13:28608269 | FLT3  | FLT3    | 14 | 14 | T | 3  | 53  |
| 11H104 | fusion | chr16:15814908 | chr16:67116210 | CBFB  | MYH11   | 5  | 34 | T | na | 71  |
| 11H107 | fusion | chr8:93029591  | chr21:36231770 | RUNX1 | RUNX1T1 | 6  | 6  | T | na | 203 |
| 11H107 | fusion | chr8:93074855  | chr21:36231770 | RUNX1 | RUNX1T1 | 6  | 5  | F | na | 4   |

|        |        |                 |                 |       |         |    |      |   |     |     |
|--------|--------|-----------------|-----------------|-------|---------|----|------|---|-----|-----|
| 11H107 | fusion | chr8:93074937   | chr21:36231770  | RUNX1 | RUNX1T1 | 6  | 2    | F | na  | 22  |
| 11H179 | fusion | chr16:15814908  | chr16:67116210  | CBFB  | MYH11   | 5  | 34   | T | na  | 62  |
| 12H042 | fusion | chr16:15814920  | chr16:67116210  | CBFB  | MYH11   | 5  | None | F | na  | 45  |
| 12H044 | fusion | chr16:15814908  | chr16:67116210  | CBFB  | MYH11   | 5  | 34   | T | na  | 112 |
| 12H045 | fusion | chr8:93029591   | chr21:36231770  | RUNX1 | RUNX1T1 | 6  | 6    | T | na  | 188 |
| 12H098 | fusion | chr8:93029591   | chr21:36231770  | RUNX1 | RUNX1T1 | 6  | 6    | T | na  | 77  |
| 12H098 | fusion | chr8:93074937   | chr21:36231770  | RUNX1 | RUNX1T1 | 6  | 2    | F | na  | 38  |
| 12H165 | fusion | chr16:15814169  | chr16:67116210  | CBFB  | MYH11   | 5  | 35   | T | na  | 32  |
| 12H165 | fusion | chr16:15814908  | chr16:67116210  | CBFB  | MYH11   | 5  | 34   | T | na  | 86  |
| 12H166 | fusion | chr8:93029591   | chr21:36231770  | RUNX1 | RUNX1T1 | 6  | 6    | T | na  | 112 |
| 12H166 | fusion | chr8:93074855   | chr21:36231770  | RUNX1 | RUNX1T1 | 6  | 5    | F | na  | 7   |
| 12H166 | fusion | chr8:93074937   | chr21:36231770  | RUNX1 | RUNX1T1 | 6  | 2    | F | na  | 24  |
| 12H180 | fusion | chr8:93029591   | chr21:36231770  | RUNX1 | RUNX1T1 | 6  | 6    | T | na  | 149 |
| 12H180 | fusion | chr8:93074937   | chr21:36231770  | RUNX1 | RUNX1T1 | 6  | 2    | F | na  | 29  |
| 12H180 | ITD    | chr13:28608273  | chr13:28608334  | FLT3  | FLT3    | 14 | 14   | T | 63  | 38  |
| 12H183 | fusion | chr8:93029591   | chr21:36231770  | RUNX1 | RUNX1T1 | 6  | 6    | T | na  | 59  |
| 12H183 | fusion | chr8:93074937   | chr21:36231770  | RUNX1 | RUNX1T1 | 6  | 2    | F | na  | 19  |
| 13H066 | fusion | chr16:15814908  | chr16:67116210  | CBFB  | MYH11   | 5  | 34   | T | na  | 107 |
| 13H066 | fusion | chr16:15814908  | chr16:67116241  | CBFB  | MYH11   | 5  | 34   | F | na  | 13  |
| 13H120 | fusion | chr16:15814908  | chr16:67116210  | CBFB  | MYH11   | 5  | 34   | T | na  | 175 |
| 13H120 | ITD    | chr13:28608219  | chr13:28608331  | FLT3  | FLT3    | 14 | 14   | F | 114 | 36  |
| 13H169 | fusion | chr8:93029591   | chr21:36231770  | RUNX1 | RUNX1T1 | 6  | 6    | T | na  | 72  |
| 13H169 | fusion | chr8:93074855   | chr21:36231770  | RUNX1 | RUNX1T1 | 6  | 5    | F | na  | 9   |
| 13H169 | fusion | chr8:93074937   | chr21:36231770  | RUNX1 | RUNX1T1 | 6  | 2    | F | na  | 39  |
| 01H001 | fusion | chr6:168265231  | chr11:118353209 | KMT2A | MLLT4   | 8  | 2    | T | na  | 40  |
| 02H017 | fusion | chr11:118355029 | chr19:6218051   | KMT2A | MLLT1   | 9  | 7    | T | na  | 28  |
| 02H032 | fusion | chr11:118353210 | chr17:36868099  | KMT2A | MLLT6   | 8  | 7    | T | na  | 9   |
| 03H067 | fusion | chr11:118352807 | chr17:75303222  | KMT2A | SEPT9   | 7  | 2    | T | na  | 54  |
| 04H041 | fusion | chr11:118352807 | chr17:75303222  | KMT2A | SEPT9   | 7  | 2    | T | na  | 31  |
| 04H121 | fusion | chr11:118355029 | chr19:18583691  | KMT2A | ELL     | 9  | 2    | T | na  | 37  |
| 04H121 | fusion | chr11:118355690 | chr19:18583691  | KMT2A | ELL     | 10 | 2    | T | na  | 24  |
| 04H121 | fusion | chr11:118359329 | chr19:18632730  | ELL   | KMT2A   | 1  | 11   | T | na  | 8   |
| 04H121 | ITD    | chr13:28608262  | chr13:28608341  | FLT3  | FLT3    | 14 | 14   | T | 75  | 9   |
| 05H025 | fusion | chr9:20365742   | chr11:118353209 | KMT2A | MLLT3   | 8  | 6    | T | na  | 23  |

|        |        |                 |                 |       |        |    |    |   |     |     |
|--------|--------|-----------------|-----------------|-------|--------|----|----|---|-----|-----|
| 05H066 | fusion | chr6:168265231  | chr11:118352806 | KMT2A | MLLT4  | 7  | 2  | F | na  | 9   |
| 05H066 | fusion | chr6:168265231  | chr11:118353209 | KMT2A | MLLT4  | 8  | 2  | T | na  | 85  |
| 05H066 | ITD    | chr13:28608270  | chr13:28608307  | FLT3  | FLT3   | 14 | 14 | T | 39  | 14  |
| 05H128 | fusion | chr10:21959378  | chr11:118353209 | KMT2A | MLLT10 | 8  | 10 | T | na  | 47  |
| 06H066 | fusion | chr11:118353210 | chr15:40920267  | KMT2A | CASC5  | 8  | 12 | T | na  | 61  |
| 06H088 | fusion | chr6:168265231  | chr11:118353209 | KMT2A | MLLT4  | 8  | 2  | T | na  | 60  |
| 06H117 | fusion | chr6:168265231  | chr11:118353209 | KMT2A | MLLT4  | 8  | 2  | T | na  | 107 |
| 06H152 | fusion | chr11:118352807 | chr17:9923213   | KMT2A | GAS7   | 7  | 2  | F | na  | 9   |
| 06H152 | fusion | chr11:118353210 | chr17:9923213   | KMT2A | GAS7   | 8  | 2  | T | na  | 36  |
| 06H152 | fusion | chr11:118354898 | chr17:10101524  | GAS7  | KMT2A  | 1  | 9  | T | na  | 19  |
| 06H152 | ITD    | chr13:28608262  | chr13:28608341  | FLT3  | FLT3   | 14 | 14 | T | 75  | 5   |
| 07H003 | fusion | chr11:118355029 | chr19:18583691  | KMT2A | ELL    | 9  | 2  | T | na  | 35  |
| 07H003 | fusion | chr11:118355690 | chr19:18583691  | KMT2A | ELL    | 10 | 2  | T | na  | 4   |
| 07H003 | fusion | chr11:118359329 | chr19:18632730  | ELL   | KMT2A  | 1  | 11 | T | na  | 10  |
| 07H003 | ITD    | chr13:28608252  | chr13:28608277  | FLT3  | FLT3   | 14 | 14 | T | 27  | 54  |
| 07H041 | fusion | chr9:20365742   | chr11:118353209 | KMT2A | MLLT3  | 8  | 6  | T | na  | 39  |
| 07H045 | fusion | chr11:118353210 | chr19:6222694   | KMT2A | MLLT1  | 8  | 6  | T | na  | 17  |
| 07H045 | ITD    | chr13:28608233  | chr13:28608350  | FLT3  | FLT3   | 14 | 14 | F | 119 | 6   |
| 07H160 | fusion | chr10:21940602  | chr11:118353209 | KMT2A | MLLT10 | 8  | 9  | T | na  | 11  |
| 08H021 | fusion | chr9:20365742   | chr11:118355028 | KMT2A | MLLT3  | 9  | 6  | T | na  | 14  |
| 08H021 | fusion | chr9:20365742   | chr11:118355689 | KMT2A | MLLT3  | 10 | 6  | T | na  | 7   |
| 08H085 | fusion | chr11:118355029 | chr19:6270769   | KMT2A | MLLT1  | 9  | 2  | T | na  | 7   |
| 08H085 | fusion | chr11:118355690 | chr19:6270769   | KMT2A | MLLT1  | 10 | 2  | T | na  | 12  |
| 08H129 | fusion | chr6:168265231  | chr11:118352806 | KMT2A | MLLT4  | 7  | 2  | F | na  | 5   |
| 08H129 | fusion | chr6:168265231  | chr11:118353209 | KMT2A | MLLT4  | 8  | 2  | T | na  | 68  |
| 08H139 | fusion | chr11:118355029 | chr19:6270769   | KMT2A | MLLT1  | 9  | 2  | T | na  | 16  |
| 09H010 | fusion | chr9:20353594   | chr11:118353209 | KMT2A | MLLT3  | 8  | 10 | T | na  | 10  |
| 09H018 | fusion | chr11:118353210 | chr19:18576727  | KMT2A | ELL    | 8  | 3  | T | na  | 40  |
| 09H018 | fusion | chr11:118354898 | chr19:18583644  | ELL   | KMT2A  | 2  | 9  | T | na  | 23  |
| 09H032 | fusion | chr9:20354877   | chr11:118353209 | KMT2A | MLLT3  | 8  | 9  | T | na  | 18  |
| 09H098 | fusion | chr9:20365742   | chr11:118355028 | KMT2A | MLLT3  | 9  | 6  | T | na  | 19  |
| 10H031 | fusion | chr6:168265231  | chr11:118352806 | KMT2A | MLLT4  | 7  | 2  | F | na  | 6   |
| 10H031 | fusion | chr6:168265231  | chr11:118353209 | KMT2A | MLLT4  | 8  | 2  | T | na  | 73  |
| 10H058 | fusion | chr9:20365742   | chr11:118353209 | KMT2A | MLLT3  | 8  | 6  | T | na  | 11  |

|        |        |                |                 |       |       |    |    |   |    |     |
|--------|--------|----------------|-----------------|-------|-------|----|----|---|----|-----|
| 10H127 | fusion | chr9:20365742  | chr11:118353209 | KMT2A | MLLT3 | 8  | 6  | T | na | 41  |
| 10H127 | ITD    | chr13:28608262 | chr13:28608341  | FLT3  | FLT3  | 14 | 14 | T | 75 | 4   |
| 12H057 | fusion | chr6:168265231 | chr11:118352806 | KMT2A | MLLT4 | 7  | 2  | F | na | 12  |
| 12H057 | fusion | chr6:168265231 | chr11:118353209 | KMT2A | MLLT4 | 8  | 2  | T | na | 76  |
| 14H031 | fusion | chr6:168265231 | chr11:118353209 | KMT2A | MLLT4 | 8  | 2  | T | na | 61  |
| 03H041 | fusion | chr5:176662822 | chr11:3765738   | NUP98 | NSD1  | 12 | 7  | T | na | 8   |
| 03H041 | ins    | chr13:28608247 | chr13:28608247  | FLT3  | FLT3  | 14 | 14 | T | 63 | 67  |
| 03H041 | ins    | chr13:28608254 | chr13:28608254  | FLT3  | FLT3  | 14 | 14 | T | 63 | 75  |
| 05H034 | fusion | chr5:176563031 | chr11:3735224   | NSD1  | NUP98 | 3  | 19 | F | na | 133 |
| 05H034 | fusion | chr5:176662822 | chr11:3765738   | NUP98 | NSD1  | 12 | 7  | T | na | 45  |
| 05H034 | fusion | chr5:176662822 | chr11:3774545   | NUP98 | NSD1  | 11 | 7  | T | na | 10  |
| 05H163 | fusion | chr5:176639196 | chr11:3756553   | NSD1  | NUP98 | 6  | 13 | T | na | 40  |
| 05H163 | fusion | chr5:176662822 | chr11:3765738   | NUP98 | NSD1  | 12 | 7  | T | na | 19  |
| 05H163 | fusion | chr5:176662822 | chr11:3774545   | NUP98 | NSD1  | 11 | 7  | T | na | 5   |
| 08H049 | fusion | chr5:176639196 | chr11:3756553   | NSD1  | NUP98 | 6  | 13 | T | na | 44  |
| 08H049 | fusion | chr5:176662822 | chr11:3765738   | NUP98 | NSD1  | 12 | 7  | T | na | 35  |
| 08H049 | fusion | chr5:176662822 | chr11:3774545   | NUP98 | NSD1  | 11 | 7  | T | na | 16  |
| 08H049 | ITD    | chr13:28608128 | chr13:28608267  | FLT3  | FLT3  | 15 | 14 | T | 57 | 85  |
| 10H038 | fusion | chr5:176662822 | chr11:3765738   | NUP98 | NSD1  | 12 | 7  | T | na | 49  |
| 10H038 | fusion | chr5:176662822 | chr11:3774545   | NUP98 | NSD1  | 11 | 7  | T | na | 18  |
| 11H027 | fusion | chr5:176662822 | chr11:3765738   | NUP98 | NSD1  | 12 | 7  | T | na | 26  |
| 11H027 | ins    | chr5:170837543 | chr5:170837543  | NPM1  | NPM1  | 11 | 11 | F | 4  | 6   |
| 11H027 | ITD    | chr13:28608232 | chr13:28608251  | FLT3  | FLT3  | 14 | 14 | T | 21 | 111 |
| 11H160 | fusion | chr5:176662822 | chr11:3765738   | NUP98 | NSD1  | 12 | 7  | T | na | 35  |
| 11H160 | fusion | chr5:176662822 | chr11:3774545   | NUP98 | NSD1  | 11 | 7  | T | na | 7   |
| 11H160 | ins    | chr13:28608252 | chr13:28608252  | FLT3  | FLT3  | 14 | 14 | T | 36 | 116 |
| 11H160 | ITD    | chr13:28608219 | chr13:28608308  | FLT3  | FLT3  | 14 | 14 | T | 93 | 11  |
| 11H160 | ITD    | chr13:28608238 | chr13:28608308  | FLT3  | FLT3  | 14 | 14 | T | 72 | 27  |
| 11H160 | ITD    | chr13:28608239 | chr13:28608312  | FLT3  | FLT3  | 14 | 14 | T | 75 | 31  |
| 02H060 | ins    | chr19:33793032 | chr19:33793032  | CEBPA | CEBPA | 1  | 1  | F | 4  | 36  |
| 04H048 | del    | chr19:33793101 | chr19:33793102  | CEBPA | CEBPA | 1  | 1  | F | 1  | 106 |
| 04H048 | ins    | chr19:33792378 | chr19:33792378  | CEBPA | CEBPA | 1  | 1  | T | 3  | 99  |
| 04H048 | ins    | chr19:33792731 | chr19:33792731  | CEBPA | CEBPA | 1  | 1  | T | 6  | 37  |
| 05H078 | del    | chr19:33793090 | chr19:33793091  | CEBPA | CEBPA | 1  | 1  | F | 1  | 183 |

|        |                  |                 |                 |       |       |    |    |    |      |     |
|--------|------------------|-----------------|-----------------|-------|-------|----|----|----|------|-----|
| 05H078 | ins              | chr19:33792375  | chr19:33792375  | CEBPA | CEBPA | 1  | 1  | T  | 3    | 152 |
| 06H026 | del              | chr19:33793115  | chr19:33793117  | CEBPA | CEBPA | 1  | 1  | F  | 2    | 144 |
| 06H026 | ITD              | chr13:28608128  | chr13:28608272  | FLT3  | FLT3  | 15 | 14 | T  | 57   | 17  |
| 06H026 | ITD              | chr19:33792361  | chr19:33792383  | CEBPA | CEBPA | 1  | 1  | T  | 24   | 132 |
| 07H020 | del              | chr19:33791526  | chr19:33791528  | CEBPA | CEBPA | 1  | 1  | na | 2    | 6   |
| 07H020 | del              | chr19:33792387  | chr19:33792405  | CEBPA | CEBPA | 1  | 1  | T  | 18   | 161 |
| 07H020 | ins              | chr19:33793252  | chr19:33793252  | CEBPA | CEBPA | 1  | 1  | F  | 1    | 49  |
| 08H048 | del              | chr19:33793022  | chr19:33793044  | CEBPA | CEBPA | 1  | 1  | F  | 22   | 5   |
| 08H048 | ins              | chr19:33792390  | chr19:33792390  | CEBPA | CEBPA | 1  | 1  | T  | 3    | 248 |
| 08H048 | ins              | chr19:33792393  | chr19:33792393  | CEBPA | CEBPA | 1  | 1  | T  | 3    | 7   |
| 08H048 | ins              | chr19:33793231  | chr19:33793231  | CEBPA | CEBPA | 1  | 1  | F  | 5    | 184 |
| 08H048 | ITD              | chr13:28608260  | chr13:28608279  | FLT3  | FLT3  | 14 | 14 | T  | 21   | 48  |
| 08H065 | repeat_expansion | chr19:33792384  | chr19:33792384  | CEBPA | CEBPA | 1  | 1  | T  | 3    | 128 |
| 08H082 | ins              | chr13:28608230  | chr13:28608230  | FLT3  | FLT3  | 14 | 14 | T  | 18   | 249 |
| 08H082 | ins              | chr19:33793206  | chr19:33793206  | CEBPA | CEBPA | 1  | 1  | F  | 2    | 34  |
| 08H082 | ins              | chr5:170837546  | chr5:170837546  | NPM1  | NPM1  | 11 | 11 | F  | 4    | 193 |
| 08H082 | ITD              | chr13:28608246  | chr13:28608321  | FLT3  | FLT3  | 14 | 14 | T  | 75   | 10  |
| 10H089 | del              | chr19:33793111  | chr19:33793112  | CEBPA | CEBPA | 1  | 1  | F  | 1    | 348 |
| 10H089 | ins              | chr19:33792381  | chr19:33792381  | CEBPA | CEBPA | 1  | 1  | T  | 3    | 126 |
| 12H039 | del              | chr19:33792968  | chr19:33792982  | CEBPA | CEBPA | 1  | 1  | F  | 14   | 91  |
| 12H175 | ins              | chr19:33792381  | chr19:33792381  | CEBPA | CEBPA | 1  | 1  | T  | 3    | 147 |
| 13H058 | del              | chr19:33792763  | chr19:33792765  | CEBPA | CEBPA | 1  | 1  | F  | 2    | 4   |
| 13H058 | del              | chr19:33793047  | chr19:33793048  | CEBPA | CEBPA | 1  | 1  | F  | 1    | 492 |
| 13H058 | ins              | chr19:33792381  | chr19:33792381  | CEBPA | CEBPA | 1  | 1  | T  | 3    | 138 |
| 09H106 | ins              | chr13:28608227  | chr13:28608227  | FLT3  | FLT3  | 14 | 14 | T  | 27   | 109 |
| 09H106 | PTD              | chr11:118339490 | chr11:118353209 | KMT2A | KMT2A | 2  | 8  | T  | 3654 | 43  |

|           |
|-----------|
| cohorts:  |
| CBF-AML   |
| MLL-F     |
| NUP98-ND1 |
| CEBPA     |
| MLL-PTD   |

**Table S5. Aberrant splicing variants previously identified in AML patients detected by TAP in Leucegene samples**

| sample | event     | chrom1 | coord1    | coord2    | event          | size | exon1 | exon2 | in_frame | support_reads |
|--------|-----------|--------|-----------|-----------|----------------|------|-------|-------|----------|---------------|
| 03H065 | CD13-Vc   | chr15  | 90347848  | 90348353  | novel_donor    | 44   | 5     | 4     | F        | 13            |
| 03H065 | FLT3-Va   | chr13  | 28623598  | 28624232  | novel_acceptor | 76   | 8     | 6     | F        | 22            |
| 03H065 | FLT3-Va   | chr13  | 28623598  | 28624232  | skipped_exon   | 140  | 8     | 6     | F        | 22            |
| 03H065 | FLT3-Vb   | chr13  | 28624359  | 28631497  | novel_donor    | 13   | 6     | 4     | F        | 7             |
| 03H065 | FLT3-Vb   | chr13  | 28624359  | 28631497  | skipped_exon   | 130  | 6     | 4     | F        | 7             |
| 03H065 | NOTCH2-Va | chr1   | 120497855 | 120506197 | skipped_exon   | 111  | 13    | 11    | T        | 6             |
| 03H065 | NOTCH2-Vb | chr1   | 120484377 | 120493347 | skipped_exon   | 273  | 18    | 15    | T        | 11            |
| 03H083 | FLT3-Va   | chr13  | 28623598  | 28624232  | novel_acceptor | 76   | 8     | 6     | F        | 25            |
| 03H083 | FLT3-Va   | chr13  | 28623598  | 28624232  | skipped_exon   | 140  | 8     | 6     | F        | 25            |
| 03H083 | NOTCH2-Vb | chr1   | 120484377 | 120493347 | skipped_exon   | 273  | 18    | 15    | T        | 5             |
| 03H095 | CD13-Vc   | chr15  | 90347848  | 90348353  | novel_donor    | 44   | 5     | 4     | F        | 12            |
| 03H095 | FLT3-Va   | chr13  | 28623598  | 28624232  | novel_acceptor | 76   | 8     | 6     | F        | 15            |
| 03H095 | FLT3-Va   | chr13  | 28623598  | 28624232  | skipped_exon   | 140  | 8     | 6     | F        | 15            |
| 03H095 | FLT3-Vc   | chr13  | 28623598  | 28631497  | skipped_exon   | 398  | 8     | 4     | F        | 4             |
| 03H095 | NOTCH2-Vb | chr1   | 120484377 | 120493347 | skipped_exon   | 273  | 18    | 15    | T        | 13            |
| 03H109 | CD13-Vc   | chr15  | 90347848  | 90348353  | novel_donor    | 44   | 5     | 4     | F        | 5             |
| 03H109 | FLT3-Va   | chr13  | 28623598  | 28624232  | novel_acceptor | 76   | 8     | 6     | F        | 21            |
| 03H109 | FLT3-Va   | chr13  | 28623598  | 28624232  | skipped_exon   | 140  | 8     | 6     | F        | 21            |
| 03H112 | CD13-Vc   | chr15  | 90347848  | 90348353  | novel_donor    | 44   | 5     | 4     | F        | 12            |
| 03H112 | FLT3-Va   | chr13  | 28623598  | 28624232  | novel_acceptor | 76   | 8     | 6     | F        | 6             |
| 03H112 | FLT3-Va   | chr13  | 28623598  | 28624232  | skipped_exon   | 140  | 8     | 6     | F        | 6             |
| 04H030 | FLT3-Va   | chr13  | 28623598  | 28624232  | novel_acceptor | 76   | 8     | 6     | F        | 21            |
| 04H030 | FLT3-Va   | chr13  | 28623598  | 28624232  | skipped_exon   | 140  | 8     | 6     | F        | 21            |
| 04H030 | FLT3-Vb   | chr13  | 28624359  | 28631497  | novel_donor    | 13   | 6     | 4     | F        | 5             |
| 04H030 | FLT3-Vb   | chr13  | 28624359  | 28631497  | skipped_exon   | 130  | 6     | 4     | F        | 5             |
| 04H030 | NOTCH2-Va | chr1   | 120497855 | 120506197 | skipped_exon   | 111  | 13    | 11    | T        | 5             |
| 04H030 | NOTCH2-Vb | chr1   | 120484377 | 120493347 | skipped_exon   | 273  | 18    | 15    | T        | 10            |
| 04H061 | CD13-Va   | chr15  | 90347848  | 90348552  | skipped_exon   | 140  | 5     | 3     | F        | 8             |
| 04H061 | CD13-Vc   | chr15  | 90347848  | 90348353  | novel_donor    | 44   | 5     | 4     | F        | 11            |
| 04H061 | FLT3-Va   | chr13  | 28623598  | 28624232  | novel_acceptor | 76   | 8     | 6     | F        | 12            |
| 04H061 | FLT3-Va   | chr13  | 28623598  | 28624232  | skipped_exon   | 140  | 8     | 6     | F        | 12            |



|        |           |       |           |           |                |     |    |    |   |    |
|--------|-----------|-------|-----------|-----------|----------------|-----|----|----|---|----|
| 04H061 | NOTCH2-Va | chr1  | 120497855 | 120506197 | skipped_exon   | 111 | 13 | 11 | T | 25 |
| 04H061 | NOTCH2-Vb | chr1  | 120484377 | 120493347 | skipped_exon   | 273 | 18 | 15 | T | 48 |
| 04H091 | FLT3-Va   | chr13 | 28623598  | 28624232  | novel_acceptor | 76  | 8  | 6  | F | 12 |
| 04H091 | FLT3-Va   | chr13 | 28623598  | 28624232  | skipped_exon   | 140 | 8  | 6  | F | 12 |
| 05H042 | FLT3-Va   | chr13 | 28623598  | 28624232  | novel_acceptor | 76  | 8  | 6  | F | 37 |
| 05H042 | FLT3-Va   | chr13 | 28623598  | 28624232  | skipped_exon   | 140 | 8  | 6  | F | 37 |
| 05H099 | CD13-Va   | chr15 | 90347848  | 90348552  | skipped_exon   | 140 | 5  | 3  | F | 22 |
| 05H099 | CD13-Vc   | chr15 | 90347848  | 90348353  | novel_donor    | 44  | 5  | 4  | F | 16 |
| 05H099 | FLT3-Va   | chr13 | 28623598  | 28624232  | novel_acceptor | 76  | 8  | 6  | F | 32 |
| 05H099 | FLT3-Va   | chr13 | 28623598  | 28624232  | skipped_exon   | 140 | 8  | 6  | F | 32 |
| 05H099 | FLT3-Vb   | chr13 | 28624359  | 28631497  | novel_donor    | 13  | 6  | 4  | F | 6  |
| 05H099 | FLT3-Vb   | chr13 | 28624359  | 28631497  | skipped_exon   | 130 | 6  | 4  | F | 6  |
| 05H099 | NOTCH2-Va | chr1  | 120497855 | 120506197 | skipped_exon   | 111 | 13 | 11 | T | 16 |
| 05H099 | NOTCH2-Vb | chr1  | 120484377 | 120493347 | skipped_exon   | 273 | 18 | 15 | T | 19 |
| 05H113 | CD13-Vc   | chr15 | 90347848  | 90348353  | novel_donor    | 44  | 5  | 4  | F | 15 |
| 05H113 | FLT3-Va   | chr13 | 28623598  | 28624232  | novel_acceptor | 76  | 8  | 6  | F | 9  |
| 05H113 | FLT3-Va   | chr13 | 28623598  | 28624232  | skipped_exon   | 140 | 8  | 6  | F | 9  |
| 05H113 | NOTCH2-Va | chr1  | 120497855 | 120506197 | skipped_exon   | 111 | 13 | 11 | T | 8  |
| 05H113 | NOTCH2-Vb | chr1  | 120484377 | 120493347 | skipped_exon   | 273 | 18 | 15 | T | 13 |
| 05H118 | FLT3-Va   | chr13 | 28623598  | 28624232  | novel_acceptor | 76  | 8  | 6  | F | 30 |
| 05H118 | FLT3-Va   | chr13 | 28623598  | 28624232  | skipped_exon   | 140 | 8  | 6  | F | 30 |
| 05H136 | CD13-Va   | chr15 | 90347848  | 90348552  | skipped_exon   | 140 | 5  | 3  | F | 47 |
| 05H136 | CD13-Vc   | chr15 | 90347848  | 90348353  | novel_donor    | 44  | 5  | 4  | F | 31 |
| 05H136 | FLT3-Va   | chr13 | 28623598  | 28624232  | novel_acceptor | 76  | 8  | 6  | F | 59 |
| 05H136 | FLT3-Va   | chr13 | 28623598  | 28624232  | skipped_exon   | 140 | 8  | 6  | F | 59 |
| 05H136 | FLT3-Vb   | chr13 | 28624359  | 28631497  | novel_donor    | 13  | 6  | 4  | F | 8  |
| 05H136 | FLT3-Vb   | chr13 | 28624359  | 28631497  | skipped_exon   | 130 | 6  | 4  | F | 8  |
| 05H136 | NOTCH2-Va | chr1  | 120497855 | 120506197 | skipped_exon   | 111 | 13 | 11 | T | 27 |
| 05H136 | NOTCH2-Vb | chr1  | 120484377 | 120493347 | skipped_exon   | 273 | 18 | 15 | T | 50 |
| 05H184 | FLT3-Va   | chr13 | 28623598  | 28624232  | novel_acceptor | 76  | 8  | 6  | F | 43 |
| 05H184 | FLT3-Va   | chr13 | 28623598  | 28624232  | skipped_exon   | 140 | 8  | 6  | F | 43 |
| 05H184 | FLT3-Vb   | chr13 | 28624359  | 28631497  | novel_donor    | 13  | 6  | 4  | F | 18 |
| 05H184 | FLT3-Vb   | chr13 | 28624359  | 28631497  | skipped_exon   | 130 | 6  | 4  | F | 18 |
| 05H184 | NOTCH2-Vb | chr1  | 120484377 | 120493347 | skipped_exon   | 273 | 18 | 15 | T | 11 |

|        |           |       |           |           |                |     |    |    |   |    |
|--------|-----------|-------|-----------|-----------|----------------|-----|----|----|---|----|
| 06H020 | CD13-Va   | chr15 | 90347848  | 90348552  | skipped_exon   | 140 | 5  | 3  | F | 6  |
| 06H020 | CD13-Vc   | chr15 | 90347848  | 90348353  | novel_donor    | 44  | 5  | 4  | F | 9  |
| 06H020 | FLT3-Va   | chr13 | 28623598  | 28624232  | novel_acceptor | 76  | 8  | 6  | F | 21 |
| 06H020 | FLT3-Va   | chr13 | 28623598  | 28624232  | skipped_exon   | 140 | 8  | 6  | F | 21 |
| 06H020 | NOTCH2-Vb | chr1  | 120484377 | 120493347 | skipped_exon   | 273 | 18 | 15 | T | 7  |
| 06H035 | CD13-Va   | chr15 | 90347848  | 90348552  | skipped_exon   | 140 | 5  | 3  | F | 10 |
| 06H035 | CD13-Vc   | chr15 | 90347848  | 90348353  | novel_donor    | 44  | 5  | 4  | F | 15 |
| 06H035 | FLT3-Va   | chr13 | 28623598  | 28624232  | novel_acceptor | 76  | 8  | 6  | F | 14 |
| 06H035 | FLT3-Va   | chr13 | 28623598  | 28624232  | skipped_exon   | 140 | 8  | 6  | F | 14 |
| 06H035 | NOTCH2-Va | chr1  | 120497855 | 120506197 | skipped_exon   | 111 | 13 | 11 | T | 17 |
| 06H035 | NOTCH2-Vb | chr1  | 120484377 | 120493347 | skipped_exon   | 273 | 18 | 15 | T | 33 |
| 06H115 | CD13-Va   | chr15 | 90347848  | 90348552  | skipped_exon   | 140 | 5  | 3  | F | 11 |
| 06H115 | CD13-Vc   | chr15 | 90347848  | 90348353  | novel_donor    | 44  | 5  | 4  | F | 20 |
| 06H115 | FLT3-Va   | chr13 | 28623598  | 28624232  | novel_acceptor | 76  | 8  | 6  | F | 12 |
| 06H115 | FLT3-Va   | chr13 | 28623598  | 28624232  | skipped_exon   | 140 | 8  | 6  | F | 12 |
| 06H115 | NOTCH2-Vb | chr1  | 120484377 | 120493347 | skipped_exon   | 273 | 18 | 15 | T | 16 |
| 07H099 | CD13-Va   | chr15 | 90347848  | 90348552  | skipped_exon   | 140 | 5  | 3  | F | 13 |
| 07H099 | CD13-Vc   | chr15 | 90347848  | 90348353  | novel_donor    | 44  | 5  | 4  | F | 6  |
| 07H099 | NOTCH2-Va | chr1  | 120497855 | 120506197 | skipped_exon   | 111 | 13 | 11 | T | 10 |
| 07H099 | NOTCH2-Vb | chr1  | 120484377 | 120493347 | skipped_exon   | 273 | 18 | 15 | T | 25 |
| 07H137 | FLT3-Va   | chr13 | 28623598  | 28624232  | novel_acceptor | 76  | 8  | 6  | F | 45 |
| 07H137 | FLT3-Va   | chr13 | 28623598  | 28624232  | skipped_exon   | 140 | 8  | 6  | F | 45 |
| 07H137 | FLT3-Vb   | chr13 | 28624359  | 28631497  | novel_donor    | 13  | 6  | 4  | F | 7  |
| 07H137 | FLT3-Vb   | chr13 | 28624359  | 28631497  | skipped_exon   | 130 | 6  | 4  | F | 7  |
| 07H137 | NOTCH2-Vb | chr1  | 120484377 | 120493347 | skipped_exon   | 273 | 18 | 15 | T | 10 |
| 07H144 | CD13-Va   | chr15 | 90347848  | 90348552  | skipped_exon   | 140 | 5  | 3  | F | 8  |
| 07H144 | CD13-Vc   | chr15 | 90347848  | 90348353  | novel_donor    | 44  | 5  | 4  | F | 12 |
| 07H144 | FLT3-Va   | chr13 | 28623598  | 28624232  | novel_acceptor | 76  | 8  | 6  | F | 47 |
| 07H144 | FLT3-Va   | chr13 | 28623598  | 28624232  | skipped_exon   | 140 | 8  | 6  | F | 47 |
| 07H144 | FLT3-Vb   | chr13 | 28624359  | 28631497  | novel_donor    | 13  | 6  | 4  | F | 4  |
| 07H144 | FLT3-Vb   | chr13 | 28624359  | 28631497  | skipped_exon   | 130 | 6  | 4  | F | 4  |
| 07H144 | NOTCH2-Va | chr1  | 120497855 | 120506197 | skipped_exon   | 111 | 13 | 11 | T | 11 |
| 07H144 | NOTCH2-Vb | chr1  | 120484377 | 120493347 | skipped_exon   | 273 | 18 | 15 | T | 23 |
| 08H034 | CD13-Va   | chr15 | 90347848  | 90348552  | skipped_exon   | 140 | 5  | 3  | F | 8  |

|        |           |       |           |           |                |     |    |    |   |    |
|--------|-----------|-------|-----------|-----------|----------------|-----|----|----|---|----|
| 08H034 | CD13-Vc   | chr15 | 90347848  | 90348353  | novel_donor    | 44  | 5  | 4  | F | 41 |
| 08H034 | FLT3-Va   | chr13 | 28623598  | 28624232  | novel_acceptor | 76  | 8  | 6  | F | 32 |
| 08H034 | FLT3-Va   | chr13 | 28623598  | 28624232  | skipped_exon   | 140 | 8  | 6  | F | 32 |
| 08H034 | FLT3-Vb   | chr13 | 28624359  | 28631497  | novel_donor    | 13  | 6  | 4  | F | 8  |
| 08H034 | FLT3-Vb   | chr13 | 28624359  | 28631497  | skipped_exon   | 130 | 6  | 4  | F | 8  |
| 08H034 | NOTCH2-Va | chr1  | 120497855 | 120506197 | skipped_exon   | 111 | 13 | 11 | T | 23 |
| 08H034 | NOTCH2-Vb | chr1  | 120484377 | 120493347 | skipped_exon   | 273 | 18 | 15 | T | 23 |
| 08H042 | FLT3-Va   | chr13 | 28623598  | 28624232  | novel_acceptor | 76  | 8  | 6  | F | 22 |
| 08H042 | FLT3-Va   | chr13 | 28623598  | 28624232  | skipped_exon   | 140 | 8  | 6  | F | 22 |
| 08H042 | NOTCH2-Va | chr1  | 120497855 | 120506197 | skipped_exon   | 111 | 13 | 11 | T | 4  |
| 08H042 | NOTCH2-Vb | chr1  | 120484377 | 120493347 | skipped_exon   | 273 | 18 | 15 | T | 5  |
| 08H072 | CD13-Vc   | chr15 | 90347848  | 90348353  | novel_donor    | 44  | 5  | 4  | F | 11 |
| 08H072 | FLT3-Va   | chr13 | 28623598  | 28624232  | novel_acceptor | 76  | 8  | 6  | F | 37 |
| 08H072 | FLT3-Va   | chr13 | 28623598  | 28624232  | skipped_exon   | 140 | 8  | 6  | F | 37 |
| 08H072 | FLT3-Vb   | chr13 | 28624359  | 28631497  | novel_donor    | 13  | 6  | 4  | F | 5  |
| 08H072 | FLT3-Vb   | chr13 | 28624359  | 28631497  | skipped_exon   | 130 | 6  | 4  | F | 5  |
| 08H072 | NOTCH2-Va | chr1  | 120497855 | 120506197 | skipped_exon   | 111 | 13 | 11 | T | 11 |
| 08H072 | NOTCH2-Vb | chr1  | 120484377 | 120493347 | skipped_exon   | 273 | 18 | 15 | T | 5  |
| 08H081 | CD13-Va   | chr15 | 90347848  | 90348552  | skipped_exon   | 140 | 5  | 3  | F | 27 |
| 08H081 | CD13-Vc   | chr15 | 90347848  | 90348353  | novel_donor    | 44  | 5  | 4  | F | 14 |
| 08H081 | FLT3-Va   | chr13 | 28623598  | 28624232  | novel_acceptor | 76  | 8  | 6  | F | 28 |
| 08H081 | FLT3-Va   | chr13 | 28623598  | 28624232  | skipped_exon   | 140 | 8  | 6  | F | 28 |
| 08H081 | FLT3-Vb   | chr13 | 28624359  | 28631497  | novel_donor    | 13  | 6  | 4  | F | 5  |
| 08H081 | FLT3-Vb   | chr13 | 28624359  | 28631497  | skipped_exon   | 130 | 6  | 4  | F | 5  |
| 08H081 | NOTCH2-Va | chr1  | 120497855 | 120506197 | skipped_exon   | 111 | 13 | 11 | T | 16 |
| 08H081 | NOTCH2-Vb | chr1  | 120484377 | 120493347 | skipped_exon   | 273 | 18 | 15 | T | 38 |
| 08H099 | CD13-Va   | chr15 | 90347848  | 90348552  | skipped_exon   | 140 | 5  | 3  | F | 23 |
| 08H099 | CD13-Vc   | chr15 | 90347848  | 90348353  | novel_donor    | 44  | 5  | 4  | F | 22 |
| 08H099 | FLT3-Va   | chr13 | 28623598  | 28624232  | novel_acceptor | 76  | 8  | 6  | F | 13 |
| 08H099 | FLT3-Va   | chr13 | 28623598  | 28624232  | skipped_exon   | 140 | 8  | 6  | F | 13 |
| 08H099 | NOTCH2-Va | chr1  | 120497855 | 120506197 | skipped_exon   | 111 | 13 | 11 | T | 27 |
| 08H099 | NOTCH2-Vb | chr1  | 120484377 | 120493347 | skipped_exon   | 273 | 18 | 15 | T | 25 |
| 09H016 | CD13-Vc   | chr15 | 90347848  | 90348353  | novel_donor    | 44  | 5  | 4  | F | 9  |
| 09H016 | FLT3-Va   | chr13 | 28623598  | 28624232  | novel_acceptor | 76  | 8  | 6  | F | 30 |

|        |           |       |           |           |                |     |    |    |   |    |
|--------|-----------|-------|-----------|-----------|----------------|-----|----|----|---|----|
| 09H016 | FLT3-Va   | chr13 | 28623598  | 28624232  | skipped_exon   | 140 | 8  | 6  | F | 30 |
| 09H040 | FLT3-Va   | chr13 | 28623598  | 28624232  | novel_acceptor | 76  | 8  | 6  | F | 24 |
| 09H040 | FLT3-Va   | chr13 | 28623598  | 28624232  | skipped_exon   | 140 | 8  | 6  | F | 24 |
| 09H066 | CD13-Va   | chr15 | 90347848  | 90348552  | skipped_exon   | 140 | 5  | 3  | F | 33 |
| 09H066 | CD13-Vc   | chr15 | 90347848  | 90348353  | novel_donor    | 44  | 5  | 4  | F | 30 |
| 09H066 | FLT3-Va   | chr13 | 28623598  | 28624232  | novel_acceptor | 76  | 8  | 6  | F | 15 |
| 09H066 | FLT3-Va   | chr13 | 28623598  | 28624232  | skipped_exon   | 140 | 8  | 6  | F | 15 |
| 09H066 | NOTCH2-Va | chr1  | 120497855 | 120506197 | skipped_exon   | 111 | 13 | 11 | T | 33 |
| 09H066 | NOTCH2-Vb | chr1  | 120484377 | 120493347 | skipped_exon   | 273 | 18 | 15 | T | 33 |
| 10H008 | CD13-Va   | chr15 | 90347848  | 90348552  | skipped_exon   | 140 | 5  | 3  | F | 10 |
| 10H008 | CD13-Vc   | chr15 | 90347848  | 90348353  | novel_donor    | 44  | 5  | 4  | F | 19 |
| 10H008 | FLT3-Va   | chr13 | 28623598  | 28624232  | novel_acceptor | 76  | 8  | 6  | F | 18 |
| 10H008 | FLT3-Va   | chr13 | 28623598  | 28624232  | skipped_exon   | 140 | 8  | 6  | F | 18 |
| 10H008 | NOTCH2-Vb | chr1  | 120484377 | 120493347 | skipped_exon   | 273 | 18 | 15 | T | 9  |
| 10H030 | CD13-Vc   | chr15 | 90347848  | 90348353  | novel_donor    | 44  | 5  | 4  | F | 9  |
| 10H030 | FLT3-Va   | chr13 | 28623598  | 28624232  | novel_acceptor | 76  | 8  | 6  | F | 70 |
| 10H030 | FLT3-Va   | chr13 | 28623598  | 28624232  | skipped_exon   | 140 | 8  | 6  | F | 70 |
| 10H030 | FLT3-Vb   | chr13 | 28624359  | 28631497  | novel_donor    | 13  | 6  | 4  | F | 4  |
| 10H030 | FLT3-Vb   | chr13 | 28624359  | 28631497  | skipped_exon   | 130 | 6  | 4  | F | 4  |
| 10H030 | NOTCH2-Va | chr1  | 120497855 | 120506197 | skipped_exon   | 111 | 13 | 11 | T | 23 |
| 10H030 | NOTCH2-Vb | chr1  | 120484377 | 120493347 | skipped_exon   | 273 | 18 | 15 | T | 26 |
| 10H119 | CD13-Vc   | chr15 | 90347848  | 90348353  | novel_donor    | 44  | 5  | 4  | F | 4  |
| 10H119 | FLT3-Va   | chr13 | 28623598  | 28624232  | novel_acceptor | 76  | 8  | 6  | F | 42 |
| 10H119 | FLT3-Va   | chr13 | 28623598  | 28624232  | skipped_exon   | 140 | 8  | 6  | F | 42 |
| 10H119 | FLT3-Vb   | chr13 | 28624359  | 28631497  | novel_donor    | 13  | 6  | 4  | F | 8  |
| 10H119 | FLT3-Vb   | chr13 | 28624359  | 28631497  | skipped_exon   | 130 | 6  | 4  | F | 8  |
| 10H119 | NOTCH2-Va | chr1  | 120497855 | 120506197 | skipped_exon   | 111 | 13 | 11 | T | 4  |
| 10H119 | NOTCH2-Vb | chr1  | 120484377 | 120493347 | skipped_exon   | 273 | 18 | 15 | T | 8  |
| 11H022 | CD13-Va   | chr15 | 90347848  | 90348552  | skipped_exon   | 140 | 5  | 3  | F | 18 |
| 11H022 | CD13-Vc   | chr15 | 90347848  | 90348353  | novel_donor    | 44  | 5  | 4  | F | 27 |
| 11H022 | FLT3-Va   | chr13 | 28623598  | 28624232  | novel_acceptor | 76  | 8  | 6  | F | 13 |
| 11H022 | FLT3-Va   | chr13 | 28623598  | 28624232  | skipped_exon   | 140 | 8  | 6  | F | 13 |
| 11H022 | NOTCH2-Va | chr1  | 120497855 | 120506197 | skipped_exon   | 111 | 13 | 11 | T | 11 |
| 11H022 | NOTCH2-Vb | chr1  | 120484377 | 120493347 | skipped_exon   | 273 | 18 | 15 | T | 18 |

|        |           |       |           |           |                |     |    |    |   |    |
|--------|-----------|-------|-----------|-----------|----------------|-----|----|----|---|----|
| 11H104 | CD13-Va   | chr15 | 90347848  | 90348552  | skipped_exon   | 140 | 5  | 3  | F | 21 |
| 11H104 | CD13-Vc   | chr15 | 90347848  | 90348353  | novel_donor    | 44  | 5  | 4  | F | 47 |
| 11H104 | FLT3-Va   | chr13 | 28623598  | 28624232  | novel_acceptor | 76  | 8  | 6  | F | 48 |
| 11H104 | FLT3-Va   | chr13 | 28623598  | 28624232  | skipped_exon   | 140 | 8  | 6  | F | 48 |
| 11H104 | FLT3-Vb   | chr13 | 28624359  | 28631497  | novel_donor    | 13  | 6  | 4  | F | 9  |
| 11H104 | FLT3-Vb   | chr13 | 28624359  | 28631497  | skipped_exon   | 130 | 6  | 4  | F | 9  |
| 11H104 | NOTCH2-Va | chr1  | 120497855 | 120506197 | skipped_exon   | 111 | 13 | 11 | T | 53 |
| 11H104 | NOTCH2-Vb | chr1  | 120484377 | 120493347 | skipped_exon   | 273 | 18 | 15 | T | 55 |
| 11H107 | FLT3-Va   | chr13 | 28623598  | 28624232  | novel_acceptor | 76  | 8  | 6  | F | 42 |
| 11H107 | FLT3-Va   | chr13 | 28623598  | 28624232  | skipped_exon   | 140 | 8  | 6  | F | 42 |
| 11H107 | FLT3-Vb   | chr13 | 28624359  | 28631497  | novel_donor    | 13  | 6  | 4  | F | 9  |
| 11H107 | FLT3-Vb   | chr13 | 28624359  | 28631497  | skipped_exon   | 130 | 6  | 4  | F | 9  |
| 11H179 | CD13-Va   | chr15 | 90347848  | 90348552  | skipped_exon   | 140 | 5  | 3  | F | 31 |
| 11H179 | CD13-Vc   | chr15 | 90347848  | 90348353  | novel_donor    | 44  | 5  | 4  | F | 65 |
| 11H179 | CD13-Vc   | chr15 | 90347848  | 90348357  | novel_donor    | 48  | 5  | 4  | T | 6  |
| 11H179 | FLT3-Va   | chr13 | 28623598  | 28624232  | novel_acceptor | 76  | 8  | 6  | F | 32 |
| 11H179 | FLT3-Va   | chr13 | 28623598  | 28624232  | skipped_exon   | 140 | 8  | 6  | F | 32 |
| 11H179 | FLT3-Vb   | chr13 | 28624359  | 28631497  | novel_donor    | 13  | 6  | 4  | F | 5  |
| 11H179 | FLT3-Vb   | chr13 | 28624359  | 28631497  | skipped_exon   | 130 | 6  | 4  | F | 5  |
| 11H179 | NOTCH2-Va | chr1  | 120497855 | 120506197 | skipped_exon   | 111 | 13 | 11 | T | 35 |
| 11H179 | NOTCH2-Vb | chr1  | 120484377 | 120493347 | skipped_exon   | 273 | 18 | 15 | T | 37 |
| 12H042 | CD13-Va   | chr15 | 90347848  | 90348552  | skipped_exon   | 140 | 5  | 3  | F | 10 |
| 12H042 | CD13-Vc   | chr15 | 90347848  | 90348353  | novel_donor    | 44  | 5  | 4  | F | 24 |
| 12H042 | FLT3-Va   | chr13 | 28623598  | 28624232  | novel_acceptor | 76  | 8  | 6  | F | 30 |
| 12H042 | FLT3-Va   | chr13 | 28623598  | 28624232  | skipped_exon   | 140 | 8  | 6  | F | 30 |
| 12H042 | FLT3-Vb   | chr13 | 28624359  | 28631497  | novel_donor    | 13  | 6  | 4  | F | 5  |
| 12H042 | FLT3-Vb   | chr13 | 28624359  | 28631497  | skipped_exon   | 130 | 6  | 4  | F | 5  |
| 12H042 | NOTCH2-Va | chr1  | 120497855 | 120506197 | skipped_exon   | 111 | 13 | 11 | T | 14 |
| 12H042 | NOTCH2-Vb | chr1  | 120484377 | 120493347 | skipped_exon   | 273 | 18 | 15 | T | 29 |
| 12H044 | CD13-Va   | chr15 | 90347848  | 90348552  | skipped_exon   | 140 | 5  | 3  | F | 18 |
| 12H044 | CD13-Vc   | chr15 | 90347848  | 90348353  | novel_donor    | 44  | 5  | 4  | F | 23 |
| 12H044 | FLT3-Va   | chr13 | 28623598  | 28624232  | novel_acceptor | 76  | 8  | 6  | F | 48 |
| 12H044 | FLT3-Va   | chr13 | 28623598  | 28624232  | skipped_exon   | 140 | 8  | 6  | F | 48 |
| 12H044 | FLT3-Vb   | chr13 | 28624359  | 28631497  | novel_donor    | 13  | 6  | 4  | F | 5  |

|        |           |       |           |           |                |     |    |    |   |    |
|--------|-----------|-------|-----------|-----------|----------------|-----|----|----|---|----|
| 12H044 | FLT3-Vb   | chr13 | 28624359  | 28631497  | skipped_exon   | 130 | 6  | 4  | F | 5  |
| 12H044 | NOTCH2-Va | chr1  | 120497855 | 120506197 | skipped_exon   | 111 | 13 | 11 | T | 7  |
| 12H044 | NOTCH2-Vb | chr1  | 120484377 | 120493347 | skipped_exon   | 273 | 18 | 15 | T | 37 |
| 12H045 | CD13-Vc   | chr15 | 90347848  | 90348353  | novel_donor    | 44  | 5  | 4  | F | 7  |
| 12H045 | FLT3-Va   | chr13 | 28623598  | 28624232  | novel_acceptor | 76  | 8  | 6  | F | 18 |
| 12H045 | FLT3-Va   | chr13 | 28623598  | 28624232  | skipped_exon   | 140 | 8  | 6  | F | 18 |
| 12H045 | FLT3-Vb   | chr13 | 28624359  | 28631497  | novel_donor    | 13  | 6  | 4  | F | 5  |
| 12H045 | FLT3-Vb   | chr13 | 28624359  | 28631497  | skipped_exon   | 130 | 6  | 4  | F | 5  |
| 12H045 | NOTCH2-Va | chr1  | 120497855 | 120506197 | skipped_exon   | 111 | 13 | 11 | T | 4  |
| 12H045 | NOTCH2-Vb | chr1  | 120484377 | 120493347 | skipped_exon   | 273 | 18 | 15 | T | 17 |
| 12H098 | CD13-Vc   | chr15 | 90347848  | 90348353  | novel_donor    | 44  | 5  | 4  | F | 15 |
| 12H098 | FLT3-Va   | chr13 | 28623598  | 28624232  | novel_acceptor | 76  | 8  | 6  | F | 7  |
| 12H098 | FLT3-Va   | chr13 | 28623598  | 28624232  | skipped_exon   | 140 | 8  | 6  | F | 7  |
| 12H098 | FLT3-Vb   | chr13 | 28624359  | 28631497  | novel_donor    | 13  | 6  | 4  | F | 5  |
| 12H098 | FLT3-Vb   | chr13 | 28624359  | 28631497  | skipped_exon   | 130 | 6  | 4  | F | 5  |
| 12H098 | NOTCH2-Va | chr1  | 120497855 | 120506197 | skipped_exon   | 111 | 13 | 11 | T | 21 |
| 12H098 | NOTCH2-Vb | chr1  | 120484377 | 120493347 | skipped_exon   | 273 | 18 | 15 | T | 22 |
| 12H165 | CD13-Va   | chr15 | 90347848  | 90348552  | skipped_exon   | 140 | 5  | 3  | F | 9  |
| 12H165 | CD13-Vc   | chr15 | 90347848  | 90348353  | novel_donor    | 44  | 5  | 4  | F | 21 |
| 12H165 | FLT3-Va   | chr13 | 28623598  | 28624232  | novel_acceptor | 76  | 8  | 6  | F | 52 |
| 12H165 | FLT3-Va   | chr13 | 28623598  | 28624232  | skipped_exon   | 140 | 8  | 6  | F | 52 |
| 12H165 | FLT3-Vb   | chr13 | 28624359  | 28631497  | novel_donor    | 13  | 6  | 4  | F | 6  |
| 12H165 | FLT3-Vb   | chr13 | 28624359  | 28631497  | skipped_exon   | 130 | 6  | 4  | F | 6  |
| 12H165 | NOTCH2-Vb | chr1  | 120484377 | 120493347 | skipped_exon   | 273 | 18 | 15 | T | 31 |
| 12H166 | FLT3-Va   | chr13 | 28623598  | 28624232  | novel_acceptor | 76  | 8  | 6  | F | 24 |
| 12H166 | FLT3-Va   | chr13 | 28623598  | 28624232  | skipped_exon   | 140 | 8  | 6  | F | 24 |
| 12H166 | NOTCH2-Va | chr1  | 120497855 | 120506197 | skipped_exon   | 111 | 13 | 11 | T | 9  |
| 12H166 | NOTCH2-Vb | chr1  | 120484377 | 120493347 | skipped_exon   | 273 | 18 | 15 | T | 16 |
| 12H180 | CD13-Vc   | chr15 | 90347848  | 90348353  | novel_donor    | 44  | 5  | 4  | F | 14 |
| 12H180 | FLT3-Va   | chr13 | 28623598  | 28624232  | novel_acceptor | 76  | 8  | 6  | F | 34 |
| 12H180 | FLT3-Va   | chr13 | 28623598  | 28624232  | skipped_exon   | 140 | 8  | 6  | F | 34 |
| 12H180 | FLT3-Vb   | chr13 | 28624359  | 28631497  | novel_donor    | 13  | 6  | 4  | F | 7  |
| 12H180 | FLT3-Vb   | chr13 | 28624359  | 28631497  | skipped_exon   | 130 | 6  | 4  | F | 7  |
| 12H180 | NOTCH2-Va | chr1  | 120497855 | 120506197 | skipped_exon   | 111 | 13 | 11 | T | 9  |

|        |           |       |           |           |                |     |    |    |   |    |
|--------|-----------|-------|-----------|-----------|----------------|-----|----|----|---|----|
| 12H180 | NOTCH2-Vb | chr1  | 120484377 | 120493347 | skipped_exon   | 273 | 18 | 15 | T | 12 |
| 12H183 | CD13-Vc   | chr15 | 90347848  | 90348353  | novel_donor    | 44  | 5  | 4  | F | 4  |
| 12H183 | FLT3-Va   | chr13 | 28623598  | 28624232  | novel_acceptor | 76  | 8  | 6  | F | 40 |
| 12H183 | FLT3-Va   | chr13 | 28623598  | 28624232  | skipped_exon   | 140 | 8  | 6  | F | 40 |
| 12H183 | FLT3-Vb   | chr13 | 28624359  | 28631497  | novel_donor    | 13  | 6  | 4  | F | 6  |
| 12H183 | FLT3-Vb   | chr13 | 28624359  | 28631497  | skipped_exon   | 130 | 6  | 4  | F | 6  |
| 12H183 | NOTCH2-Va | chr1  | 120497855 | 120506197 | skipped_exon   | 111 | 13 | 11 | T | 10 |
| 12H183 | NOTCH2-Vb | chr1  | 120484377 | 120493347 | skipped_exon   | 273 | 18 | 15 | T | 11 |
| 13H066 | CD13-Vc   | chr15 | 90347848  | 90348353  | novel_donor    | 44  | 5  | 4  | F | 14 |
| 13H066 | FLT3-Va   | chr13 | 28623598  | 28624232  | novel_acceptor | 76  | 8  | 6  | F | 10 |
| 13H066 | FLT3-Va   | chr13 | 28623598  | 28624232  | skipped_exon   | 140 | 8  | 6  | F | 10 |
| 13H066 | NOTCH2-Vb | chr1  | 120484377 | 120493347 | skipped_exon   | 273 | 18 | 15 | T | 10 |
| 13H120 | CD13-Va   | chr15 | 90347848  | 90348552  | skipped_exon   | 140 | 5  | 3  | F | 13 |
| 13H120 | CD13-Vc   | chr15 | 90347848  | 90348353  | novel_donor    | 44  | 5  | 4  | F | 19 |
| 13H120 | FLT3-Va   | chr13 | 28623598  | 28624232  | novel_acceptor | 76  | 8  | 6  | F | 17 |
| 13H120 | FLT3-Va   | chr13 | 28623598  | 28624232  | skipped_exon   | 140 | 8  | 6  | F | 17 |
| 13H120 | NOTCH2-Va | chr1  | 120497855 | 120506197 | skipped_exon   | 111 | 13 | 11 | T | 12 |
| 13H120 | NOTCH2-Vb | chr1  | 120484377 | 120493347 | skipped_exon   | 273 | 18 | 15 | T | 39 |
| 13H169 | CD13-Vc   | chr15 | 90347848  | 90348353  | novel_donor    | 44  | 5  | 4  | F | 10 |
| 13H169 | FLT3-Va   | chr13 | 28623598  | 28624232  | novel_acceptor | 76  | 8  | 6  | F | 35 |
| 13H169 | FLT3-Va   | chr13 | 28623598  | 28624232  | skipped_exon   | 140 | 8  | 6  | F | 35 |
| 13H169 | FLT3-Vb   | chr13 | 28624359  | 28631497  | novel_donor    | 13  | 6  | 4  | F | 4  |
| 13H169 | FLT3-Vb   | chr13 | 28624359  | 28631497  | skipped_exon   | 130 | 6  | 4  | F | 4  |
| 13H169 | NOTCH2-Va | chr1  | 120497855 | 120506197 | skipped_exon   | 111 | 13 | 11 | T | 11 |
| 13H169 | NOTCH2-Vb | chr1  | 120484377 | 120493347 | skipped_exon   | 273 | 18 | 15 | T | 16 |
| 01H001 | CD13-Va   | chr15 | 90347848  | 90348552  | skipped_exon   | 140 | 5  | 3  | F | 5  |
| 01H001 | FLT3-Va   | chr13 | 28623598  | 28624232  | novel_acceptor | 76  | 8  | 6  | F | 13 |
| 01H001 | FLT3-Va   | chr13 | 28623598  | 28624232  | skipped_exon   | 140 | 8  | 6  | F | 13 |
| 02H017 | FLT3-Va   | chr13 | 28623598  | 28624232  | novel_acceptor | 76  | 8  | 6  | F | 10 |
| 02H017 | FLT3-Va   | chr13 | 28623598  | 28624232  | skipped_exon   | 140 | 8  | 6  | F | 10 |
| 02H032 | FLT3-Va   | chr13 | 28623598  | 28624232  | novel_acceptor | 76  | 8  | 6  | F | 29 |
| 02H032 | FLT3-Va   | chr13 | 28623598  | 28624232  | skipped_exon   | 140 | 8  | 6  | F | 29 |
| 03H067 | FLT3-Va   | chr13 | 28623598  | 28624232  | novel_acceptor | 76  | 8  | 6  | F | 25 |
| 03H067 | FLT3-Va   | chr13 | 28623598  | 28624232  | skipped_exon   | 140 | 8  | 6  | F | 25 |

|        |           |       |           |           |                |     |    |    |   |    |
|--------|-----------|-------|-----------|-----------|----------------|-----|----|----|---|----|
| 03H067 | FLT3-Vb   | chr13 | 28624359  | 28631497  | novel_donor    | 13  | 6  | 4  | F | 5  |
| 03H067 | FLT3-Vb   | chr13 | 28624359  | 28631497  | skipped_exon   | 130 | 6  | 4  | F | 5  |
| 03H067 | NOTCH2-Vb | chr1  | 120484377 | 120493347 | skipped_exon   | 273 | 18 | 15 | T | 14 |
| 04H041 | FLT3-Va   | chr13 | 28623598  | 28624232  | novel_acceptor | 76  | 8  | 6  | F | 22 |
| 04H041 | FLT3-Va   | chr13 | 28623598  | 28624232  | skipped_exon   | 140 | 8  | 6  | F | 22 |
| 04H041 | NOTCH2-Va | chr1  | 120497855 | 120506197 | skipped_exon   | 111 | 13 | 11 | T | 10 |
| 04H041 | NOTCH2-Vb | chr1  | 120484377 | 120493347 | skipped_exon   | 273 | 18 | 15 | T | 46 |
| 04H080 | FLT3-Va   | chr13 | 28623598  | 28624232  | novel_acceptor | 76  | 8  | 6  | F | 13 |
| 04H080 | FLT3-Va   | chr13 | 28623598  | 28624232  | skipped_exon   | 140 | 8  | 6  | F | 13 |
| 04H080 | NOTCH2-Vb | chr1  | 120484377 | 120493347 | skipped_exon   | 273 | 18 | 15 | T | 7  |
| 04H121 | FLT3-Va   | chr13 | 28623598  | 28624232  | novel_acceptor | 76  | 8  | 6  | F | 71 |
| 04H121 | FLT3-Va   | chr13 | 28623598  | 28624232  | skipped_exon   | 140 | 8  | 6  | F | 71 |
| 04H121 | FLT3-Vc   | chr13 | 28623598  | 28631497  | skipped_exon   | 398 | 8  | 4  | F | 5  |
| 05H025 | FLT3-Va   | chr13 | 28623598  | 28624232  | novel_acceptor | 76  | 8  | 6  | F | 28 |
| 05H025 | FLT3-Va   | chr13 | 28623598  | 28624232  | skipped_exon   | 140 | 8  | 6  | F | 28 |
| 05H025 | FLT3-Vb   | chr13 | 28624359  | 28631497  | novel_donor    | 13  | 6  | 4  | F | 9  |
| 05H025 | FLT3-Vb   | chr13 | 28624359  | 28631497  | skipped_exon   | 130 | 6  | 4  | F | 9  |
| 05H025 | NOTCH2-Va | chr1  | 120497855 | 120506197 | skipped_exon   | 111 | 13 | 11 | T | 22 |
| 05H025 | NOTCH2-Vb | chr1  | 120484377 | 120493347 | skipped_exon   | 273 | 18 | 15 | T | 42 |
| 05H066 | CD13-Va   | chr15 | 90347848  | 90348552  | skipped_exon   | 140 | 5  | 3  | F | 6  |
| 05H066 | CD13-Vc   | chr15 | 90347848  | 90348353  | novel_donor    | 44  | 5  | 4  | F | 15 |
| 05H066 | FLT3-Va   | chr13 | 28623598  | 28624232  | novel_acceptor | 76  | 8  | 6  | F | 34 |
| 05H066 | FLT3-Va   | chr13 | 28623598  | 28624232  | skipped_exon   | 140 | 8  | 6  | F | 34 |
| 05H066 | FLT3-Vb   | chr13 | 28624359  | 28631497  | novel_donor    | 13  | 6  | 4  | F | 6  |
| 05H066 | FLT3-Vb   | chr13 | 28624359  | 28631497  | skipped_exon   | 130 | 6  | 4  | F | 6  |
| 05H066 | NOTCH2-Va | chr1  | 120497855 | 120506197 | skipped_exon   | 111 | 13 | 11 | T | 10 |
| 05H066 | NOTCH2-Vb | chr1  | 120484377 | 120493347 | skipped_exon   | 273 | 18 | 15 | T | 26 |
| 05H128 | FLT3-Va   | chr13 | 28623598  | 28624232  | novel_acceptor | 76  | 8  | 6  | F | 29 |
| 05H128 | FLT3-Va   | chr13 | 28623598  | 28624232  | skipped_exon   | 140 | 8  | 6  | F | 29 |
| 05H128 | FLT3-Vb   | chr13 | 28624359  | 28631497  | novel_donor    | 13  | 6  | 4  | F | 7  |
| 05H128 | FLT3-Vb   | chr13 | 28624359  | 28631497  | skipped_exon   | 130 | 6  | 4  | F | 7  |
| 05H128 | NOTCH2-Vb | chr1  | 120484377 | 120493347 | skipped_exon   | 273 | 18 | 15 | T | 58 |
| 06H066 | CD13-Vc   | chr15 | 90347848  | 90348353  | novel_donor    | 44  | 5  | 4  | F | 5  |
| 06H066 | FLT3-Va   | chr13 | 28623598  | 28624232  | novel_acceptor | 76  | 8  | 6  | F | 24 |



|        |           |       |           |           |                |     |    |    |   |    |
|--------|-----------|-------|-----------|-----------|----------------|-----|----|----|---|----|
| 06H066 | FLT3-Va   | chr13 | 28623598  | 28624232  | skipped_exon   | 140 | 8  | 6  | F | 24 |
| 06H066 | FLT3-Vb   | chr13 | 28624359  | 28631497  | novel_donor    | 13  | 6  | 4  | F | 14 |
| 06H066 | FLT3-Vb   | chr13 | 28624359  | 28631497  | skipped_exon   | 130 | 6  | 4  | F | 14 |
| 06H066 | FLT3-Vc   | chr13 | 28623598  | 28631497  | skipped_exon   | 398 | 8  | 4  | F | 4  |
| 06H066 | NOTCH2-Va | chr1  | 120497855 | 120506197 | skipped_exon   | 111 | 13 | 11 | T | 7  |
| 06H066 | NOTCH2-Vb | chr1  | 120484377 | 120493347 | skipped_exon   | 273 | 18 | 15 | T | 12 |
| 06H088 | FLT3-Va   | chr13 | 28623598  | 28624232  | novel_acceptor | 76  | 8  | 6  | F | 18 |
| 06H088 | FLT3-Va   | chr13 | 28623598  | 28624232  | skipped_exon   | 140 | 8  | 6  | F | 18 |
| 06H088 | NOTCH2-Vb | chr1  | 120484377 | 120493347 | skipped_exon   | 273 | 18 | 15 | T | 11 |
| 06H117 | CD13-Vc   | chr15 | 90347848  | 90348353  | novel_donor    | 44  | 5  | 4  | F | 6  |
| 06H117 | FLT3-Va   | chr13 | 28623598  | 28624232  | novel_acceptor | 76  | 8  | 6  | F | 12 |
| 06H117 | FLT3-Va   | chr13 | 28623598  | 28624232  | skipped_exon   | 140 | 8  | 6  | F | 12 |
| 06H117 | FLT3-Vb   | chr13 | 28624359  | 28631497  | novel_donor    | 13  | 6  | 4  | F | 5  |
| 06H117 | FLT3-Vb   | chr13 | 28624359  | 28631497  | skipped_exon   | 130 | 6  | 4  | F | 5  |
| 06H117 | NOTCH2-Va | chr1  | 120497855 | 120506197 | skipped_exon   | 111 | 13 | 11 | T | 19 |
| 06H117 | NOTCH2-Vb | chr1  | 120484377 | 120493347 | skipped_exon   | 273 | 18 | 15 | T | 52 |
| 06H152 | CD13-Va   | chr15 | 90347848  | 90348552  | skipped_exon   | 140 | 5  | 3  | F | 8  |
| 06H152 | FLT3-Va   | chr13 | 28623598  | 28624232  | novel_acceptor | 76  | 8  | 6  | F | 26 |
| 06H152 | FLT3-Va   | chr13 | 28623598  | 28624232  | skipped_exon   | 140 | 8  | 6  | F | 26 |
| 06H152 | FLT3-Vb   | chr13 | 28624359  | 28631497  | novel_donor    | 13  | 6  | 4  | F | 13 |
| 06H152 | FLT3-Vb   | chr13 | 28624359  | 28631497  | skipped_exon   | 130 | 6  | 4  | F | 13 |
| 06H152 | NOTCH2-Vb | chr1  | 120484377 | 120493347 | skipped_exon   | 273 | 18 | 15 | T | 32 |
| 07H003 | FLT3-Va   | chr13 | 28623598  | 28624232  | novel_acceptor | 76  | 8  | 6  | F | 36 |
| 07H003 | FLT3-Va   | chr13 | 28623598  | 28624232  | skipped_exon   | 140 | 8  | 6  | F | 36 |
| 07H003 | FLT3-Vb   | chr13 | 28624359  | 28631497  | novel_donor    | 13  | 6  | 4  | F | 4  |
| 07H003 | FLT3-Vb   | chr13 | 28624359  | 28631497  | skipped_exon   | 130 | 6  | 4  | F | 4  |
| 07H003 | NOTCH2-Va | chr1  | 120497855 | 120506197 | skipped_exon   | 111 | 13 | 11 | T | 6  |
| 07H003 | NOTCH2-Vb | chr1  | 120484377 | 120493347 | skipped_exon   | 273 | 18 | 15 | T | 24 |
| 07H041 | FLT3-Va   | chr13 | 28623598  | 28624232  | novel_acceptor | 76  | 8  | 6  | F | 64 |
| 07H041 | FLT3-Va   | chr13 | 28623598  | 28624232  | skipped_exon   | 140 | 8  | 6  | F | 64 |
| 07H041 | FLT3-Vb   | chr13 | 28624359  | 28631497  | novel_donor    | 13  | 6  | 4  | F | 14 |
| 07H041 | FLT3-Vb   | chr13 | 28624359  | 28631497  | skipped_exon   | 130 | 6  | 4  | F | 14 |
| 07H041 | NOTCH2-Va | chr1  | 120497855 | 120506197 | skipped_exon   | 111 | 13 | 11 | T | 8  |
| 07H041 | NOTCH2-Vb | chr1  | 120484377 | 120493347 | skipped_exon   | 273 | 18 | 15 | T | 25 |

|        |           |       |           |           |                |     |    |    |   |    |
|--------|-----------|-------|-----------|-----------|----------------|-----|----|----|---|----|
| 07H045 | FLT3-Va   | chr13 | 28623598  | 28624232  | novel_acceptor | 76  | 8  | 6  | F | 60 |
| 07H045 | FLT3-Va   | chr13 | 28623598  | 28624232  | skipped_exon   | 140 | 8  | 6  | F | 60 |
| 07H045 | FLT3-Vb   | chr13 | 28624359  | 28631497  | novel_donor    | 13  | 6  | 4  | F | 15 |
| 07H045 | FLT3-Vb   | chr13 | 28624359  | 28631497  | skipped_exon   | 130 | 6  | 4  | F | 15 |
| 07H045 | NOTCH2-Va | chr1  | 120497855 | 120506197 | skipped_exon   | 111 | 13 | 11 | T | 10 |
| 07H045 | NOTCH2-Vb | chr1  | 120484377 | 120493347 | skipped_exon   | 273 | 18 | 15 | T | 32 |
| 08H021 | FLT3-Va   | chr13 | 28623598  | 28624232  | novel_acceptor | 76  | 8  | 6  | F | 30 |
| 08H021 | FLT3-Va   | chr13 | 28623598  | 28624232  | skipped_exon   | 140 | 8  | 6  | F | 30 |
| 08H021 | NOTCH2-Va | chr1  | 120497855 | 120506197 | skipped_exon   | 111 | 13 | 11 | T | 5  |
| 08H021 | NOTCH2-Vb | chr1  | 120484377 | 120493347 | skipped_exon   | 273 | 18 | 15 | T | 14 |
| 08H085 | FLT3-Va   | chr13 | 28623598  | 28624232  | novel_acceptor | 76  | 8  | 6  | F | 35 |
| 08H085 | FLT3-Va   | chr13 | 28623598  | 28624232  | skipped_exon   | 140 | 8  | 6  | F | 35 |
| 08H085 | FLT3-Vb   | chr13 | 28624359  | 28631497  | novel_donor    | 13  | 6  | 4  | F | 41 |
| 08H085 | FLT3-Vb   | chr13 | 28624359  | 28631497  | skipped_exon   | 130 | 6  | 4  | F | 41 |
| 08H085 | NOTCH2-Va | chr1  | 120497855 | 120506197 | skipped_exon   | 111 | 13 | 11 | T | 8  |
| 08H085 | NOTCH2-Vb | chr1  | 120484377 | 120493347 | skipped_exon   | 273 | 18 | 15 | T | 17 |
| 08H129 | CD13-Vc   | chr15 | 90347848  | 90348353  | novel_donor    | 44  | 5  | 4  | F | 21 |
| 08H129 | FLT3-Va   | chr13 | 28623598  | 28624232  | novel_acceptor | 76  | 8  | 6  | F | 45 |
| 08H129 | FLT3-Va   | chr13 | 28623598  | 28624232  | skipped_exon   | 140 | 8  | 6  | F | 45 |
| 08H129 | FLT3-Vb   | chr13 | 28624359  | 28631497  | novel_donor    | 13  | 6  | 4  | F | 8  |
| 08H129 | FLT3-Vb   | chr13 | 28624359  | 28631497  | skipped_exon   | 130 | 6  | 4  | F | 8  |
| 08H129 | NOTCH2-Va | chr1  | 120497855 | 120506197 | skipped_exon   | 111 | 13 | 11 | T | 8  |
| 08H129 | NOTCH2-Vb | chr1  | 120484377 | 120493347 | skipped_exon   | 273 | 18 | 15 | T | 36 |
| 08H139 | FLT3-Va   | chr13 | 28623598  | 28624232  | novel_acceptor | 76  | 8  | 6  | F | 74 |
| 08H139 | FLT3-Va   | chr13 | 28623598  | 28624232  | skipped_exon   | 140 | 8  | 6  | F | 74 |
| 08H139 | FLT3-Vb   | chr13 | 28624359  | 28631497  | novel_donor    | 13  | 6  | 4  | F | 14 |
| 08H139 | FLT3-Vb   | chr13 | 28624359  | 28631497  | skipped_exon   | 130 | 6  | 4  | F | 14 |
| 08H139 | NOTCH2-Va | chr1  | 120497855 | 120506197 | skipped_exon   | 111 | 13 | 11 | T | 11 |
| 08H139 | NOTCH2-Vb | chr1  | 120484377 | 120493347 | skipped_exon   | 273 | 18 | 15 | T | 30 |
| 09H010 | FLT3-Va   | chr13 | 28623598  | 28624232  | novel_acceptor | 76  | 8  | 6  | F | 45 |
| 09H010 | FLT3-Va   | chr13 | 28623598  | 28624232  | skipped_exon   | 140 | 8  | 6  | F | 45 |
| 09H010 | FLT3-Vb   | chr13 | 28624359  | 28631497  | novel_donor    | 13  | 6  | 4  | F | 4  |
| 09H010 | FLT3-Vb   | chr13 | 28624359  | 28631497  | skipped_exon   | 130 | 6  | 4  | F | 4  |
| 09H010 | NOTCH2-Va | chr1  | 120497855 | 120506197 | skipped_exon   | 111 | 13 | 11 | T | 10 |

|        |           |       |           |           |                |     |    |    |   |    |
|--------|-----------|-------|-----------|-----------|----------------|-----|----|----|---|----|
| 09H010 | NOTCH2-Vb | chr1  | 120484377 | 120493347 | skipped_exon   | 273 | 18 | 15 | T | 24 |
| 09H018 | CD13-Vc   | chr15 | 90347848  | 90348353  | novel_donor    | 44  | 5  | 4  | F | 14 |
| 09H018 | NOTCH2-Va | chr1  | 120497855 | 120506197 | skipped_exon   | 111 | 13 | 11 | T | 20 |
| 09H018 | NOTCH2-Vb | chr1  | 120484377 | 120493347 | skipped_exon   | 273 | 18 | 15 | T | 29 |
| 09H032 | FLT3-Va   | chr13 | 28623598  | 28624232  | novel_acceptor | 76  | 8  | 6  | F | 63 |
| 09H032 | FLT3-Va   | chr13 | 28623598  | 28624232  | skipped_exon   | 140 | 8  | 6  | F | 63 |
| 09H032 | FLT3-Vb   | chr13 | 28624359  | 28631497  | novel_donor    | 13  | 6  | 4  | F | 10 |
| 09H032 | FLT3-Vb   | chr13 | 28624359  | 28631497  | skipped_exon   | 130 | 6  | 4  | F | 10 |
| 09H032 | NOTCH2-Vb | chr1  | 120484377 | 120493347 | skipped_exon   | 273 | 18 | 15 | T | 27 |
| 09H098 | FLT3-Va   | chr13 | 28623598  | 28624232  | novel_acceptor | 76  | 8  | 6  | F | 19 |
| 09H098 | FLT3-Va   | chr13 | 28623598  | 28624232  | skipped_exon   | 140 | 8  | 6  | F | 19 |
| 09H098 | FLT3-Vb   | chr13 | 28624359  | 28631497  | novel_donor    | 13  | 6  | 4  | F | 6  |
| 09H098 | FLT3-Vb   | chr13 | 28624359  | 28631497  | skipped_exon   | 130 | 6  | 4  | F | 6  |
| 09H098 | NOTCH2-Vb | chr1  | 120484377 | 120493347 | skipped_exon   | 273 | 18 | 15 | T | 18 |
| 10H031 | CD13-Va   | chr15 | 90347848  | 90348552  | skipped_exon   | 140 | 5  | 3  | F | 7  |
| 10H031 | CD13-Vc   | chr15 | 90347848  | 90348353  | novel_donor    | 44  | 5  | 4  | F | 7  |
| 10H031 | FLT3-Va   | chr13 | 28623598  | 28624232  | novel_acceptor | 76  | 8  | 6  | F | 17 |
| 10H031 | FLT3-Va   | chr13 | 28623598  | 28624232  | skipped_exon   | 140 | 8  | 6  | F | 17 |
| 10H031 | FLT3-Vb   | chr13 | 28624359  | 28631497  | novel_donor    | 13  | 6  | 4  | F | 4  |
| 10H031 | FLT3-Vb   | chr13 | 28624359  | 28631497  | skipped_exon   | 130 | 6  | 4  | F | 4  |
| 10H031 | NOTCH2-Va | chr1  | 120497855 | 120506197 | skipped_exon   | 111 | 13 | 11 | T | 28 |
| 10H031 | NOTCH2-Vb | chr1  | 120484377 | 120493347 | skipped_exon   | 273 | 18 | 15 | T | 45 |
| 10H058 | FLT3-Va   | chr13 | 28623598  | 28624232  | novel_acceptor | 76  | 8  | 6  | F | 33 |
| 10H058 | FLT3-Va   | chr13 | 28623598  | 28624232  | skipped_exon   | 140 | 8  | 6  | F | 33 |
| 10H058 | NOTCH2-Va | chr1  | 120497855 | 120506197 | skipped_exon   | 111 | 13 | 11 | T | 19 |
| 10H058 | NOTCH2-Vb | chr1  | 120484377 | 120493347 | skipped_exon   | 273 | 18 | 15 | T | 27 |
| 10H127 | FLT3-Va   | chr13 | 28623598  | 28624232  | novel_acceptor | 76  | 8  | 6  | F | 26 |
| 10H127 | FLT3-Va   | chr13 | 28623598  | 28624232  | skipped_exon   | 140 | 8  | 6  | F | 26 |
| 10H127 | FLT3-Vb   | chr13 | 28624359  | 28631497  | novel_donor    | 13  | 6  | 4  | F | 5  |
| 10H127 | FLT3-Vb   | chr13 | 28624359  | 28631497  | skipped_exon   | 130 | 6  | 4  | F | 5  |
| 12H057 | CD13-Va   | chr15 | 90347848  | 90348552  | skipped_exon   | 140 | 5  | 3  | F | 12 |
| 12H057 | CD13-Vc   | chr15 | 90347848  | 90348353  | novel_donor    | 44  | 5  | 4  | F | 34 |
| 12H057 | FLT3-Va   | chr13 | 28623598  | 28624232  | novel_acceptor | 76  | 8  | 6  | F | 29 |
| 12H057 | FLT3-Va   | chr13 | 28623598  | 28624232  | skipped_exon   | 140 | 8  | 6  | F | 29 |

|        |           |       |           |           |                |     |    |    |   |    |
|--------|-----------|-------|-----------|-----------|----------------|-----|----|----|---|----|
| 12H057 | FLT3-Vb   | chr13 | 28624359  | 28631497  | novel_donor    | 13  | 6  | 4  | F | 7  |
| 12H057 | FLT3-Vb   | chr13 | 28624359  | 28631497  | skipped_exon   | 130 | 6  | 4  | F | 7  |
| 12H057 | NOTCH2-Va | chr1  | 120497855 | 120506197 | skipped_exon   | 111 | 13 | 11 | T | 8  |
| 12H057 | NOTCH2-Vb | chr1  | 120484377 | 120493347 | skipped_exon   | 273 | 18 | 15 | T | 23 |
| 14H031 | FLT3-Va   | chr13 | 28623598  | 28624232  | novel_acceptor | 76  | 8  | 6  | F | 49 |
| 14H031 | FLT3-Va   | chr13 | 28623598  | 28624232  | skipped_exon   | 140 | 8  | 6  | F | 49 |
| 14H031 | NOTCH2-Va | chr1  | 120497855 | 120506197 | skipped_exon   | 111 | 13 | 11 | T | 21 |
| 14H031 | NOTCH2-Vb | chr1  | 120484377 | 120493347 | skipped_exon   | 273 | 18 | 15 | T | 38 |
| 03H041 | FLT3-Va   | chr13 | 28623598  | 28624232  | novel_acceptor | 76  | 8  | 6  | F | 4  |
| 03H041 | FLT3-Va   | chr13 | 28623598  | 28624232  | skipped_exon   | 140 | 8  | 6  | F | 4  |
| 05H034 | CD13-Vc   | chr15 | 90347848  | 90348353  | novel_donor    | 44  | 5  | 4  | F | 6  |
| 05H034 | FLT3-Va   | chr13 | 28623598  | 28624232  | novel_acceptor | 76  | 8  | 6  | F | 20 |
| 05H034 | FLT3-Va   | chr13 | 28623598  | 28624232  | skipped_exon   | 140 | 8  | 6  | F | 20 |
| 05H034 | FLT3-Vb   | chr13 | 28624359  | 28631497  | novel_donor    | 13  | 6  | 4  | F | 5  |
| 05H034 | FLT3-Vb   | chr13 | 28624359  | 28631497  | skipped_exon   | 130 | 6  | 4  | F | 5  |
| 05H034 | NOTCH2-Va | chr1  | 120497855 | 120506197 | skipped_exon   | 111 | 13 | 11 | T | 4  |
| 05H034 | NOTCH2-Vb | chr1  | 120484377 | 120493347 | skipped_exon   | 273 | 18 | 15 | T | 15 |
| 05H163 | CD13-Vc   | chr15 | 90347848  | 90348353  | novel_donor    | 44  | 5  | 4  | F | 5  |
| 05H163 | FLT3-Va   | chr13 | 28623598  | 28624232  | novel_acceptor | 76  | 8  | 6  | F | 16 |
| 05H163 | FLT3-Va   | chr13 | 28623598  | 28624232  | skipped_exon   | 140 | 8  | 6  | F | 16 |
| 05H163 | NOTCH2-Va | chr1  | 120497855 | 120506197 | skipped_exon   | 111 | 13 | 11 | T | 7  |
| 05H163 | NOTCH2-Vb | chr1  | 120484377 | 120493347 | skipped_exon   | 273 | 18 | 15 | T | 16 |
| 08H049 | FLT3-Va   | chr13 | 28623598  | 28624232  | novel_acceptor | 76  | 8  | 6  | F | 23 |
| 08H049 | FLT3-Va   | chr13 | 28623598  | 28624232  | skipped_exon   | 140 | 8  | 6  | F | 23 |
| 08H049 | FLT3-Vb   | chr13 | 28624359  | 28631497  | novel_donor    | 13  | 6  | 4  | F | 4  |
| 08H049 | FLT3-Vb   | chr13 | 28624359  | 28631497  | skipped_exon   | 130 | 6  | 4  | F | 4  |
| 08H049 | NOTCH2-Va | chr1  | 120497855 | 120506197 | skipped_exon   | 111 | 13 | 11 | T | 19 |
| 08H049 | NOTCH2-Vb | chr1  | 120484377 | 120493347 | skipped_exon   | 273 | 18 | 15 | T | 36 |
| 10H038 | CD13-Vc   | chr15 | 90347848  | 90348353  | novel_donor    | 44  | 5  | 4  | F | 8  |
| 10H038 | FLT3-Va   | chr13 | 28623598  | 28624232  | novel_acceptor | 76  | 8  | 6  | F | 52 |
| 10H038 | FLT3-Va   | chr13 | 28623598  | 28624232  | skipped_exon   | 140 | 8  | 6  | F | 52 |
| 10H038 | FLT3-Vb   | chr13 | 28624359  | 28631497  | novel_donor    | 13  | 6  | 4  | F | 18 |
| 10H038 | FLT3-Vb   | chr13 | 28624359  | 28631497  | skipped_exon   | 130 | 6  | 4  | F | 18 |
| 11H027 | FLT3-Va   | chr13 | 28623598  | 28624232  | novel_acceptor | 76  | 8  | 6  | F | 31 |

|        |           |       |           |           |                |     |    |    |   |    |
|--------|-----------|-------|-----------|-----------|----------------|-----|----|----|---|----|
| 11H027 | FLT3-Va   | chr13 | 28623598  | 28624232  | skipped_exon   | 140 | 8  | 6  | F | 31 |
| 11H027 | FLT3-Vb   | chr13 | 28624359  | 28631497  | novel_donor    | 13  | 6  | 4  | F | 9  |
| 11H027 | FLT3-Vb   | chr13 | 28624359  | 28631497  | skipped_exon   | 130 | 6  | 4  | F | 9  |
| 11H027 | NOTCH2-Vb | chr1  | 120484377 | 120493347 | skipped_exon   | 273 | 18 | 15 | T | 5  |
| 11H160 | FLT3-Va   | chr13 | 28623598  | 28624232  | novel_acceptor | 76  | 8  | 6  | F | 34 |
| 11H160 | FLT3-Va   | chr13 | 28623598  | 28624232  | skipped_exon   | 140 | 8  | 6  | F | 34 |
| 11H160 | FLT3-Vb   | chr13 | 28624359  | 28631497  | novel_donor    | 13  | 6  | 4  | F | 5  |
| 11H160 | FLT3-Vb   | chr13 | 28624359  | 28631497  | skipped_exon   | 130 | 6  | 4  | F | 5  |
| 11H160 | NOTCH2-Vb | chr1  | 120484377 | 120493347 | skipped_exon   | 273 | 18 | 15 | T | 13 |
| 04H048 | CD13-Vc   | chr15 | 90347848  | 90348353  | novel_donor    | 44  | 5  | 4  | F | 4  |
| 04H048 | FLT3-Va   | chr13 | 28623598  | 28624232  | novel_acceptor | 76  | 8  | 6  | F | 16 |
| 04H048 | FLT3-Va   | chr13 | 28623598  | 28624232  | skipped_exon   | 140 | 8  | 6  | F | 16 |
| 04H048 | NOTCH2-Vb | chr1  | 120484377 | 120493347 | skipped_exon   | 273 | 18 | 15 | T | 22 |
| 05H078 | CD13-Vc   | chr15 | 90347848  | 90348353  | novel_donor    | 44  | 5  | 4  | F | 7  |
| 05H078 | FLT3-Va   | chr13 | 28623598  | 28624232  | novel_acceptor | 76  | 8  | 6  | F | 24 |
| 05H078 | FLT3-Va   | chr13 | 28623598  | 28624232  | skipped_exon   | 140 | 8  | 6  | F | 24 |
| 05H078 | NOTCH2-Vb | chr1  | 120484377 | 120493347 | skipped_exon   | 273 | 18 | 15 | T | 6  |
| 07H020 | CD13-Vc   | chr15 | 90347848  | 90348353  | novel_donor    | 44  | 5  | 4  | F | 19 |
| 07H020 | FLT3-Va   | chr13 | 28623598  | 28624232  | novel_acceptor | 76  | 8  | 6  | F | 14 |
| 07H020 | FLT3-Va   | chr13 | 28623598  | 28624232  | skipped_exon   | 140 | 8  | 6  | F | 14 |
| 07H020 | NOTCH2-Va | chr1  | 120497855 | 120506197 | skipped_exon   | 111 | 13 | 11 | T | 12 |
| 07H020 | NOTCH2-Vb | chr1  | 120484377 | 120493347 | skipped_exon   | 273 | 18 | 15 | T | 32 |
| 08H048 | CD13-Vc   | chr15 | 90347848  | 90348353  | novel_donor    | 44  | 5  | 4  | F | 12 |
| 08H048 | FLT3-Va   | chr13 | 28623598  | 28624232  | novel_acceptor | 76  | 8  | 6  | F | 33 |
| 08H048 | FLT3-Va   | chr13 | 28623598  | 28624232  | skipped_exon   | 140 | 8  | 6  | F | 33 |
| 08H048 | NOTCH2-Vb | chr1  | 120484377 | 120493347 | skipped_exon   | 273 | 18 | 15 | T | 6  |
| 08H065 | FLT3-Va   | chr13 | 28623598  | 28624232  | novel_acceptor | 76  | 8  | 6  | F | 19 |
| 08H065 | FLT3-Va   | chr13 | 28623598  | 28624232  | skipped_exon   | 140 | 8  | 6  | F | 19 |
| 08H082 | FLT3-Va   | chr13 | 28623598  | 28624232  | novel_acceptor | 76  | 8  | 6  | F | 33 |
| 08H082 | FLT3-Va   | chr13 | 28623598  | 28624232  | skipped_exon   | 140 | 8  | 6  | F | 33 |
| 08H082 | FLT3-Vb   | chr13 | 28624359  | 28631497  | novel_donor    | 13  | 6  | 4  | F | 9  |
| 08H082 | FLT3-Vb   | chr13 | 28624359  | 28631497  | skipped_exon   | 130 | 6  | 4  | F | 9  |
| 08H082 | NOTCH2-Vb | chr1  | 120484377 | 120493347 | skipped_exon   | 273 | 18 | 15 | T | 21 |
| 10H089 | CD13-Va   | chr15 | 90347848  | 90348552  | skipped_exon   | 140 | 5  | 3  | F | 15 |

|        |           |       |           |           |                |     |    |    |   |    |
|--------|-----------|-------|-----------|-----------|----------------|-----|----|----|---|----|
| 10H089 | CD13-Vc   | chr15 | 90347848  | 90348353  | novel_donor    | 44  | 5  | 4  | F | 16 |
| 10H089 | FLT3-Va   | chr13 | 28623598  | 28624232  | novel_acceptor | 76  | 8  | 6  | F | 13 |
| 10H089 | FLT3-Va   | chr13 | 28623598  | 28624232  | skipped_exon   | 140 | 8  | 6  | F | 13 |
| 10H089 | FLT3-Vb   | chr13 | 28624359  | 28631497  | novel_donor    | 13  | 6  | 4  | F | 7  |
| 10H089 | FLT3-Vb   | chr13 | 28624359  | 28631497  | skipped_exon   | 130 | 6  | 4  | F | 7  |
| 10H089 | NOTCH2-Va | chr1  | 120497855 | 120506197 | skipped_exon   | 111 | 13 | 11 | T | 28 |
| 10H089 | NOTCH2-Vb | chr1  | 120484377 | 120493347 | skipped_exon   | 273 | 18 | 15 | T | 38 |
| 12H039 | CD13-Vc   | chr15 | 90347848  | 90348353  | novel_donor    | 44  | 5  | 4  | F | 5  |
| 12H039 | FLT3-Va   | chr13 | 28623598  | 28624232  | novel_acceptor | 76  | 8  | 6  | F | 11 |
| 12H039 | FLT3-Va   | chr13 | 28623598  | 28624232  | skipped_exon   | 140 | 8  | 6  | F | 11 |
| 12H039 | FLT3-Vb   | chr13 | 28624359  | 28631497  | novel_donor    | 13  | 6  | 4  | F | 4  |
| 12H039 | FLT3-Vb   | chr13 | 28624359  | 28631497  | skipped_exon   | 130 | 6  | 4  | F | 4  |
| 12H039 | NOTCH2-Va | chr1  | 120497855 | 120506197 | skipped_exon   | 111 | 13 | 11 | T | 8  |
| 12H039 | NOTCH2-Vb | chr1  | 120484377 | 120493347 | skipped_exon   | 273 | 18 | 15 | T | 28 |
| 12H175 | FLT3-Va   | chr13 | 28623598  | 28624232  | novel_acceptor | 76  | 8  | 6  | F | 12 |
| 12H175 | FLT3-Va   | chr13 | 28623598  | 28624232  | skipped_exon   | 140 | 8  | 6  | F | 12 |
| 13H058 | CD13-Vc   | chr15 | 90347848  | 90348353  | novel_donor    | 44  | 5  | 4  | F | 4  |
| 13H058 | FLT3-Va   | chr13 | 28623598  | 28624232  | novel_acceptor | 76  | 8  | 6  | F | 11 |
| 13H058 | FLT3-Va   | chr13 | 28623598  | 28624232  | skipped_exon   | 140 | 8  | 6  | F | 11 |
| 13H058 | FLT3-Vb   | chr13 | 28624359  | 28631497  | novel_donor    | 13  | 6  | 4  | F | 4  |
| 13H058 | FLT3-Vb   | chr13 | 28624359  | 28631497  | skipped_exon   | 130 | 6  | 4  | F | 4  |
| 13H058 | NOTCH2-Vb | chr1  | 120484377 | 120493347 | skipped_exon   | 273 | 18 | 15 | T | 19 |
| 09H106 | CD13-Va   | chr15 | 90347848  | 90348552  | skipped_exon   | 140 | 5  | 3  | F | 8  |
| 09H106 | CD13-Vc   | chr15 | 90347848  | 90348353  | novel_donor    | 44  | 5  | 4  | F | 15 |
| 09H106 | FLT3-Va   | chr13 | 28623598  | 28624232  | novel_acceptor | 76  | 8  | 6  | F | 24 |
| 09H106 | FLT3-Va   | chr13 | 28623598  | 28624232  | skipped_exon   | 140 | 8  | 6  | F | 24 |
| 09H106 | NOTCH2-Va | chr1  | 120497855 | 120506197 | skipped_exon   | 111 | 13 | 11 | T | 13 |
| 09H106 | NOTCH2-Vb | chr1  | 120484377 | 120493347 | skipped_exon   | 273 | 18 | 15 | T | 35 |

|           |
|-----------|
| cohorts:  |
| CBF-AML   |
| MLL-F     |
| NUP98-ND1 |
| CEBPA     |
| MLL-PTD   |
